# Supplementary material for: Systematics of Ditaxinae and Related Lineages within the Subfamily Acalyphoideae (Euphorbiaceae) Based on Molecular Phylogenetics
Source: MDPI journal article supplement (doi:10.3390/biology12020173), 2023-01-21

## SUPPLEMENTARY MATERIAL S2

### **Systematics of Ditaxinae and related lineages within subfamily Acalyphoideae (Euphorbiaceae) based on molecular phylogenetics**

Josimar Klkamp, Ricarda Riina, Yocupitzia Ramrez-Amezcu, Joo R.V. Iganci, Ins Cordeiro, Raquel Gonzlez-Pramo, Sabina Irene Lara-Cabrera and Jos Fernando A. Baumgratz

**Supplementary material S2:** Supplementary tables and figures.

**TABLE S1:** Extraction steps by the CTAB method adapted from Doyle (1991)

| Steps | Proceedings                                                                                                                                                                                                                                                                                          |
|-------|------------------------------------------------------------------------------------------------------------------------------------------------------------------------------------------------------------------------------------------------------------------------------------------------------|
| 1     | Buffer CTAB/sample = 0.02 ml CTAB (2% p/v); 0.02 ml PVP [Pm40,000] (2% p/v); 0.28 ml NaCl (1.4 M); 0.04 ml EDTA pH 8 (20 mM); 0.1 ml Tris-HCL pH 8 (100 mM); 0,02 ml 2-mercaptoetanol (2% v/v); 0.56 ml H <sub>2</sub> O. Obs: Add the solid components over the liquids and bake at 65 °C for 1 hr. |
| 2     | Macerate 15 mg of dehydrated tissue in TissueLyser II (Quiagen) for 10 min.                                                                                                                                                                                                                          |
| 3     | Add 950 µl of the CTAB Buffer to each tube of already macerated sample and homogenize.                                                                                                                                                                                                               |
| 4     | Place the tubes in a thermoblock for 1 h at 65°C with constant agitation at 650-700 rpm.                                                                                                                                                                                                             |
| 5     | Add 700 µl of chloroform (isoamyl NO) to each tube                                                                                                                                                                                                                                                   |
| 6     | Centrifuge the tubes for 15 min at 13,000 rpm at 4°C                                                                                                                                                                                                                                                 |
| 7     | Transfer the supernatant (ca. 800 µl) to a new tube                                                                                                                                                                                                                                                  |
| 8     | Add 550 µl of isopropanol (stored in the freezer) to each tube and homogenize.                                                                                                                                                                                                                       |
| 9     | Store in the freezer -20°C for 24-48 hours                                                                                                                                                                                                                                                           |
| 10    | Centrifuge the tubes for 15 min at 13,000 rpm at 4°C                                                                                                                                                                                                                                                 |
| 11    | Discard all the supernatant, leaving only the pellet adhering to the bottom of the tube.                                                                                                                                                                                                             |
| 12    | Add 500 µl of 70% ethanol to each tube and vortex to loosen the pellet from the bottom of the tube.                                                                                                                                                                                                  |
| 13    | Repeat step 10                                                                                                                                                                                                                                                                                       |
| 14    | Repeat step 11                                                                                                                                                                                                                                                                                       |
| 15    | Repeat step 12                                                                                                                                                                                                                                                                                       |
| 16    | Repeat step 10                                                                                                                                                                                                                                                                                       |
| 17    | Discard the liquid and place the open tubes at 37 °C for 1 hr to dry all the liquid.                                                                                                                                                                                                                 |
| 18    | Add 50 µl MilliQ water at 65°C and store at 4°C for use or dilution.                                                                                                                                                                                                                                 |

### **Reference**

Doyle, J. DNA Protocols for Plants. In: Hewitt, G.M.; Johnston, A.W.B.; Young, J.P.W., Eds., Molecular Techniques in Taxonomy, Springer, Berlin, Heidelberg, **1991**. 283-293.

**TABLE S2.** List of molecular markers, primer sequence and references

| Region        | Primer name | Primer sequence (5' to 3')  | Reference                              |
|---------------|-------------|-----------------------------|----------------------------------------|
| ETS           | ETS F2      | ATGATCGTTTGGSTTTGGCAGGCTC   | Wurdack, K. <i>Com. Pers.</i>          |
|               | 18S 5R      | GAATTAGTTCATACTTACACATGCATG | Wurdack, K. <i>Com. Pers.</i>          |
|               | 18S 5prR    | CTGGCAGGATCAACCAGGTAGCA     | Cardinal-McTeague <i>et al.</i> (2019) |
|               | ETS F3F     | GTGTCGTGCTCTCGGATGC         | Cardinal-McTeague <i>et al.</i> (2019) |
| <i>petB-D</i> | pipetB1411F | GCCGTMTTTATGTTAATGC         | Löhne & Borsch, 2005                   |
|               | pipetD738R  | AATTTAGCYCTTAATACAGG        | Löhne & Borsch, 2005                   |
|               | EPHpetD657F | TTTATRATACTATCGGAGTG        | Cervantes <i>et al.</i> 2016           |
|               | EPHpetD891R | TAAATGCTCAATRCCCAAG         | Cervantes <i>et al.</i> 2016           |
| ITS           | ITSw1f      | CCTTATCATTTAGAGGAAGGAG      | Silva <i>et al.</i> 2020               |
|               | ITSw2r      | TATGCTTAAAYTCAGCGGGT        | Silva <i>et al.</i> 2020               |
|               | ITSp2r      | GCCRAGATATCCGTTGCCGAG       | Cheng <i>et al.</i> 2016               |
|               | ITSp3f      | YGACTCTCGGCAACGGATA         | Cheng <i>et al.</i> 2016               |
| <i>trnL-F</i> | trnTc       | CGAAATCGGTAGACGCTACG        | Taberlet <i>et al.</i> 1991            |
|               | trnTd       | GGGGATAGAGGGACTTGAAC        | Taberlet <i>et al.</i> 1991            |
|               | trnTe       | GGTTCAAGTCCCTCTATCCC        | Taberlet <i>et al.</i> 1991            |
|               | trnTf       | ATTTGAAGTGGTGACACGAG        | Taberlet <i>et al.</i> 1991            |
| trnT-L        | trnA2       | CAAATGCGATGCTCTAACCT        | Shaw <i>et al.</i> 2007                |
|               | trnB        | TCTACCGATTTCGCCATATC        | Shaw <i>et al.</i> 2007                |

**References**

- Cardinal-McTeague, W.M.; Wurdack, K.J.; Sigel, E.M.; Gillespie, L.J. Seed size evolution and biogeography of *Plukenetia* (Euphorbiaceae), a pantropical genus with traditionally cultivated oilseed species. *BMC Evolutionary Biology* **2019**, *19*: 29, Doi: 10.1186/s12862-018-1308-9
- Cervantes, A.; Fuentes, S.; Gutiérrez, J.; Magallón, S.; Borsch, T. Successive arrivals since the Miocene shaped the diversity of the Caribbean Acalyphoideae (Euphorbiaceae). *Journal of Biogeography* **2016**, *43*, 1773–1785, Doi: 10.1111/jbi.12790.
- Cheng, T.; Xu, C.; Lei, L.; Li, C.; Zhang, Y.; Zhou, S. Barcoding the kingdom Plantae: new PCR primers for ITS regions of plants with improved universality and specificity. *Molecular Ecology Resources* **2016**, *16*: 138–149, Doi: 10.1111/1755-0998.12438.
- Löhne, C.; Borsch, T. Molecular Evolution and Phylogenetic Utility of the *petD* Group II Intron: A Case Study in Basal Angiosperms. *Molecular Biology and Evolution* **2005**, *22*: 317–332. Doi: 10.1093/molbev/msi019.
- Shaw, J.; Lickey, E.B.; Schilling, E.E.; Small, R.L. Comparison of whole chloroplast genome sequences to choose noncoding regions for phylogenetic studies in angiosperms: the tortoise and the hare III. *American Journal of Botany* **2007**, *94*: 275–288.
- Silva, O.L.M.; Riina, R.; Cordeiro, I. Phylogeny and biogeography of *Astraea* with new insights into the evolutionary history of Crotoneae (Euphorbiaceae). *Molecular Phylogenetics and Evolution* **2020**, *145*: 16, Doi: 10.1016/j.ympev.2020.106738.
- Taberlet, P.; Gielly, L.; Pautou, G.; Bouvet, J. Universal primers for amplification of three non-coding regions of chloroplast DNA. *Plant Molecular Biology* **1991**, *17*: 1105–1109.

**PCRs support information**

The PCR amplifications were conducted in thermocyclers Eppendorf Mastercycler X50s PC, with 25uL reactions (thermocycler temperature protocols see Supplementary materials S2: Table S3 [below]). Each reaction tube includes 12uL of MyTaq Red Mix (Bioline); 10uL H<sub>2</sub>O; 1uL 10uM of each primer and 1uL Genomic DNA. For samples of difficult amplification, PuReTaq Ready-To-Go PCR Beads (GE Healthcare) were used, added up 22uL H<sub>2</sub>O; 1uL 10uM of each primer and 1uL Genomic DNA. All prc products were analyzed on agarose gel with 4 uL per well (1 blue dye + 3 uL PCR product), if reactions used MyTaq Red Mix, use 4uL PCR product, later the gel was checked under UV light. The PCR reactions that presented amplified DNA, were purified with ExoSap PCR Purification, 6,5 uL (1:10 concentration) was added to each tube. Afterwards, the tubes were submitted to a program 15 min at 37 C + 15 min 80 C in the thermocycler. For sequencing plates, 5 µl purified DNA + 5 µl 5mM primers was added to each sample and sent for sequencing at MACROGEN (Macrogen, Madrid, Spain), using the same amplification primers (Supplementary materials S2: Table 2).

**TABLE S3.** Amplification and sequencing protocols

| Region        | Amplification primers     |                                                            | Thermocycler protocols                                                                                                                                                                       |
|---------------|---------------------------|------------------------------------------------------------|----------------------------------------------------------------------------------------------------------------------------------------------------------------------------------------------|
|               | Dry samples on silica gel | Herbarium samples                                          |                                                                                                                                                                                              |
| ETS           | ETS_F2 + 18S_5R           | (ETS_F2 + 18S_5prR) and (ETS_F3F + 18S_5R)                 | Initial denaturation step = 5 min at 95 °C<br>34 cycles of denaturation = 1 min at 95 °C<br>Annealing = 1 min at 52 °C<br>Elongation = 1 min at 72°C<br>Final extension = 10 min at 72 °C    |
| ITS           | ITSw1f + ITSr2r           | (ITSw1f + ITSr2r) and (ITSr3f + ITSr2r)                    | Initial denaturation step = 5 min at 95 °C<br>36 cycles of denaturation = 1 min at 95 °C<br>Annealing = 1.5 min at 50 °C<br>Elongation = 45 sec at 72°C<br>Final extension = 10 min at 72 °C |
| <i>petB-D</i> | pipetB1411F + pipetD738R  | (pipetB1411F + EPHpetD891R) and (EPHpetD657F + pipetD738R) | Initial denaturation step = 5 min at 94 °C<br>30 cycles of denaturation = 1 min at 94 °C<br>Annealing = 1 min at 50 °C<br>Elongation = 2 min at 72°C<br>Final extension = 15 min at 72 °C    |
| <i>trnL-F</i> | trnTc + trnTf             | (trnTc + trnTd) and (trnTe + trnTf)                        | Initial denaturation step = 2 min at 94 °C<br>36 cycles of denaturation = 1 min at 95 °C<br>Annealing = 2 min at 53 °C<br>Elongation = 1 min at 72°C<br>Final extension = 10 min at 72 °C    |
| <i>trnT-L</i> | trnA2+trnB                | trnA2+trnB                                                 | Initial denaturation step = 5 min at 95 °C<br>30 cycles of denaturation = 30 sec at 95 °C<br>Annealing = 1 min at 52 °C<br>Elongation = 1 min at 72°C<br>Final extension = 10 min at 72 °C   |

### **Figures S1-S9**

The phylogenetic trees of the individual markers, the concatenated matrices of plastid and nuclear markers are presented below.

Figure S1: Consensus tree of the *trnT* marker obtained by Bayesian Inference performed in MrBayes. Numbers indicate Bayesian posterior probabilities

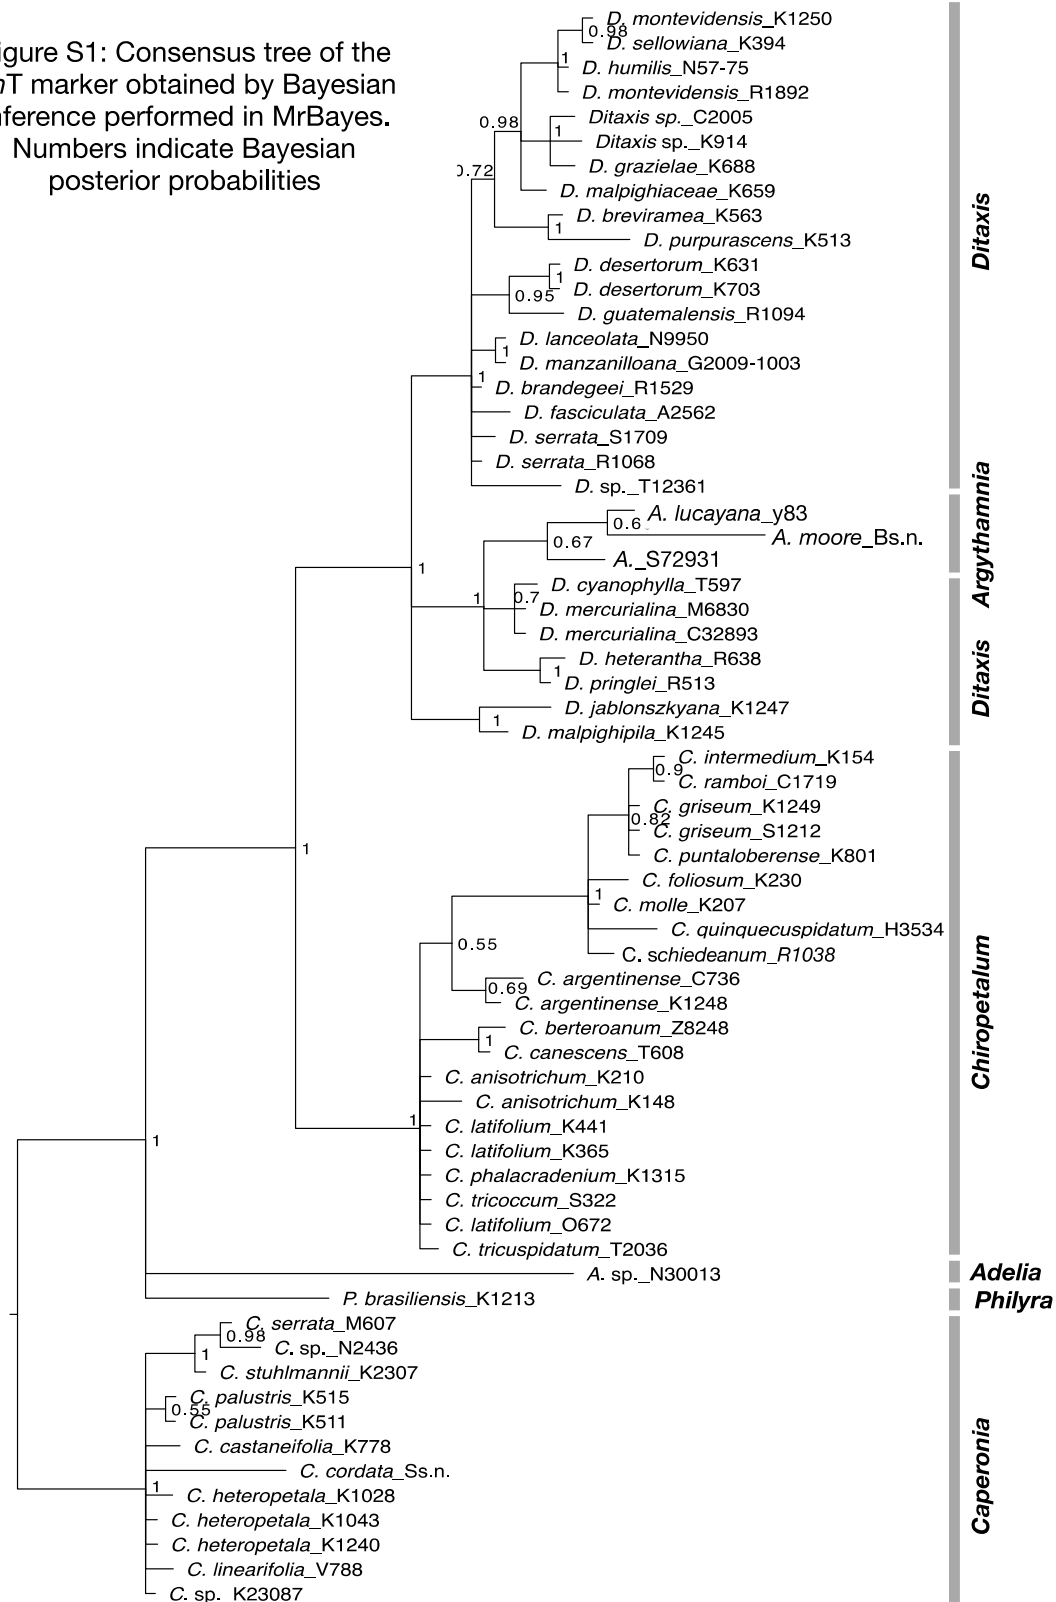

Figure S2: Consensus tree of the *petD* marker obtained by Bayesian Inference performed in MrBayes. Numbers indicate Bayesian posterior probabilities.

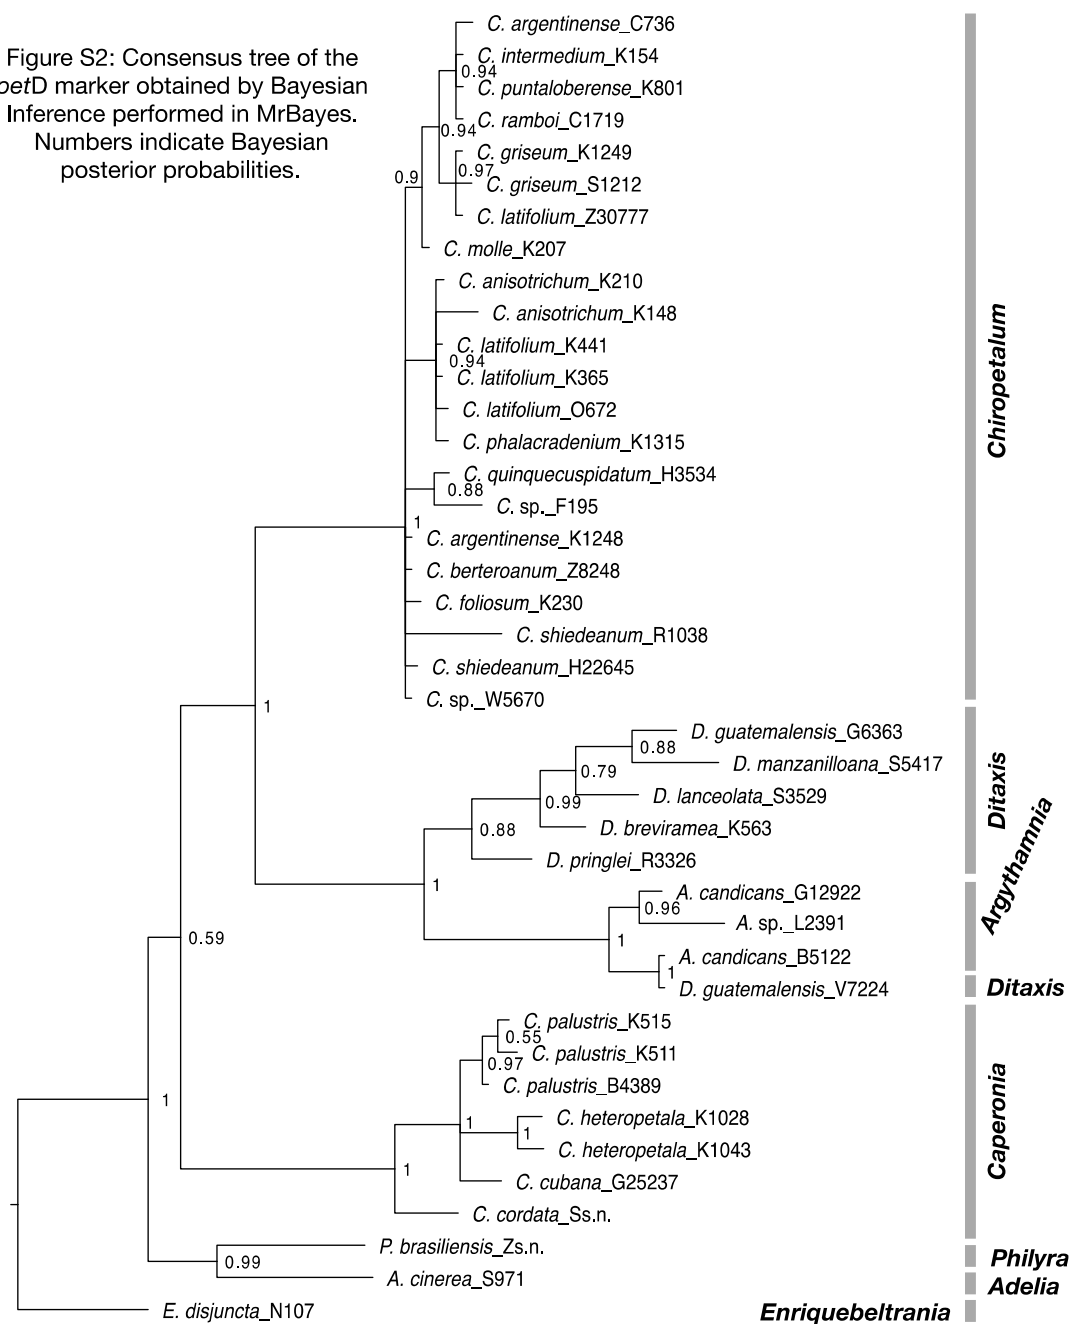

Figure S3: Consensus tree of the *trnL-F* marker obtained by Bayesian Inference performed in MrBayes. Numbers indicate Bayesian posterior probabilities.

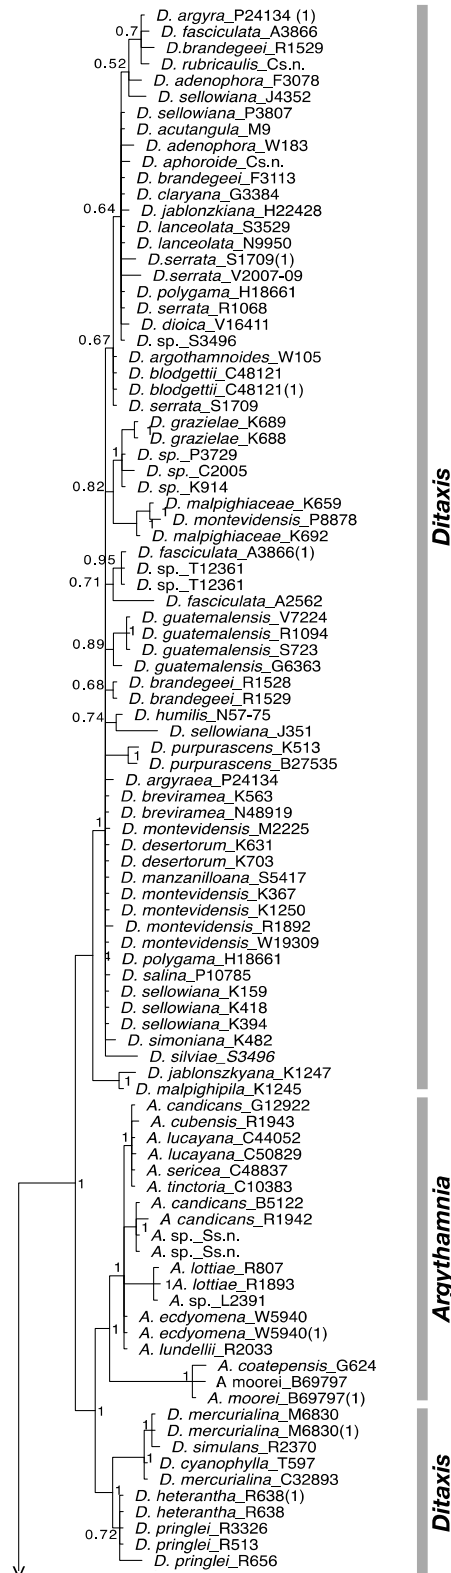

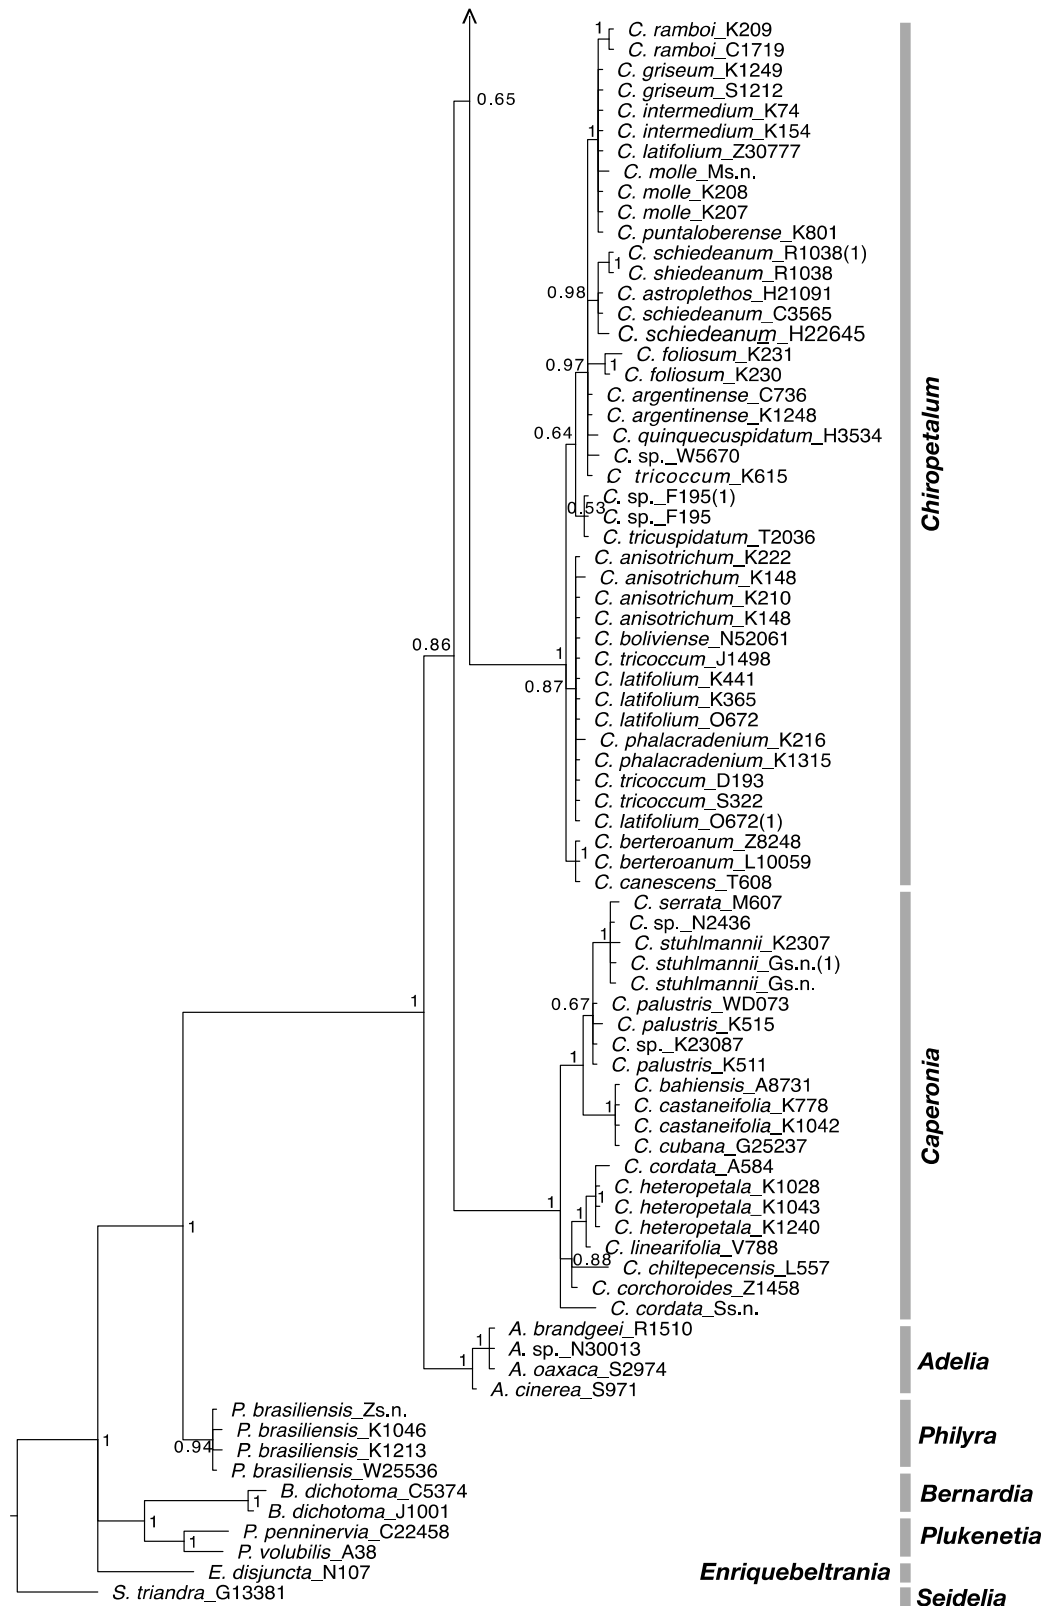



Figure S4: Consensus tree of the ITS marker obtained by Bayesian Inference performed in MrBayes. Numbers indicate Bayesian posterior probabilities.

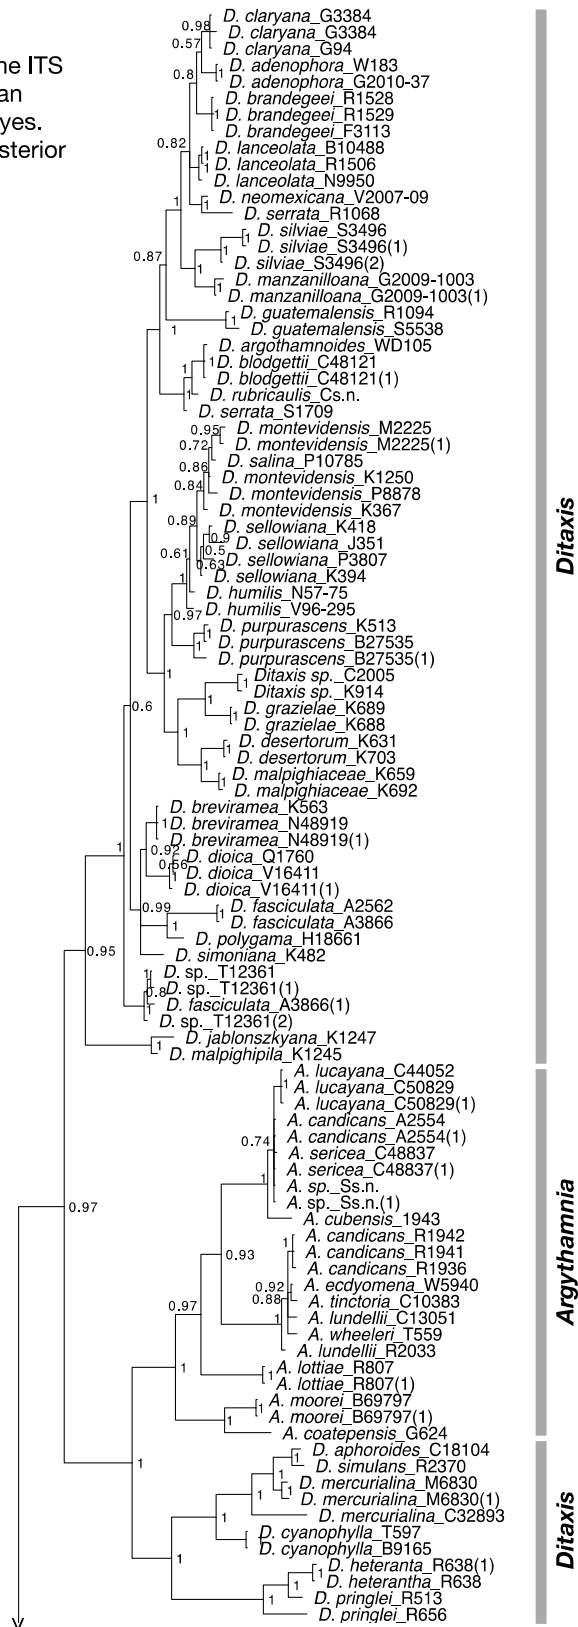

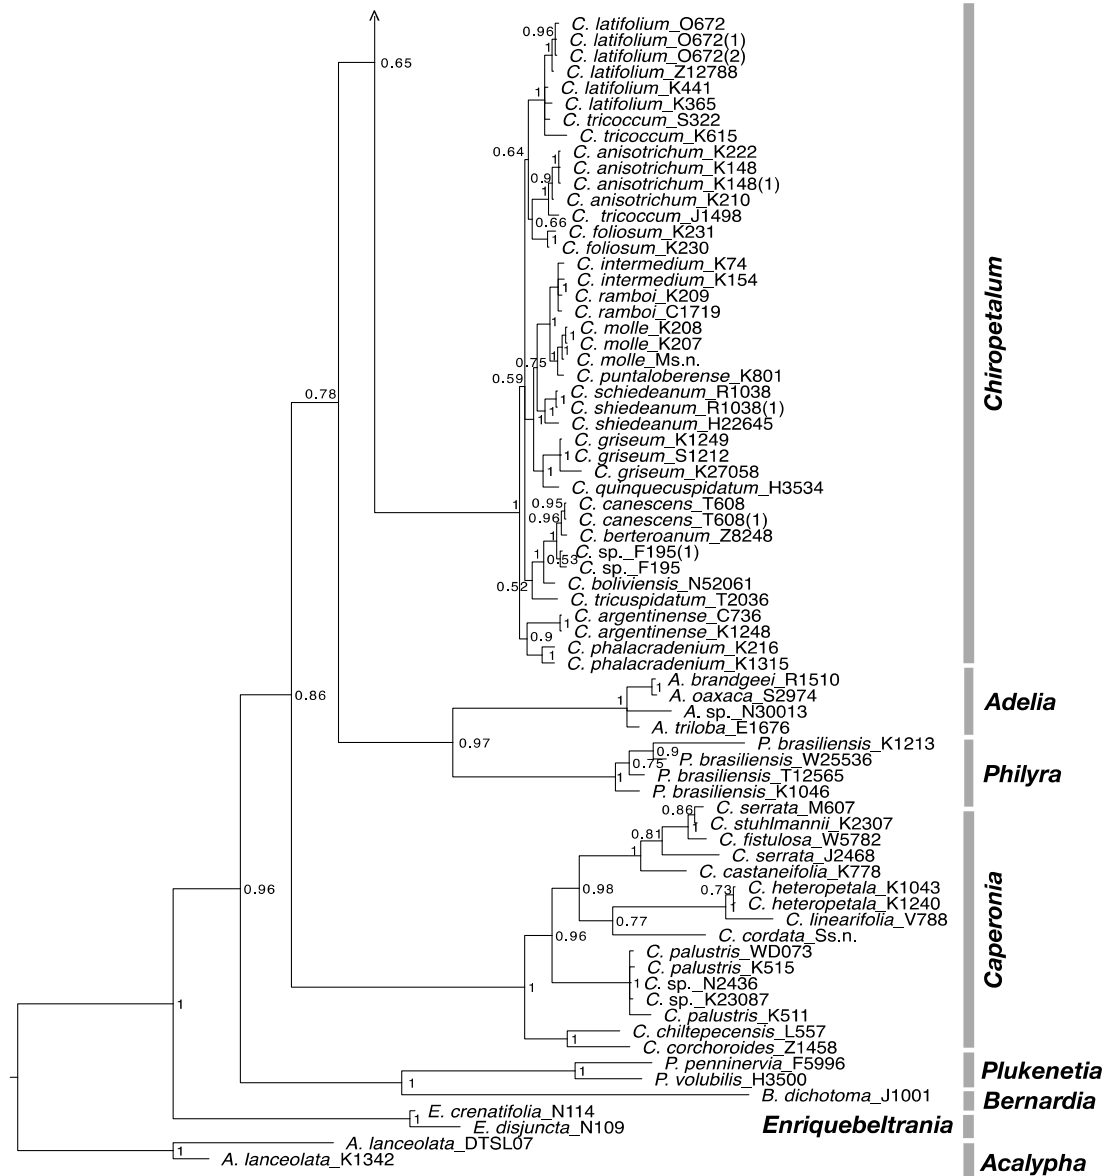

Consensus tree of the ETS  
ained by Bayesian Inference  
ed in MrBayes. Numbers  
ate Bayesian posterior  
probabilities.

*D. sellowiana\_K418*  
*D. sellowiana\_K394*  
*D. sellowiana\_P3807*  
*D. humilis\_N57-75*  
*D. montevidensis\_K367*  
*D. montevidensis\_K1250*  
*D. salina\_P10785*  
*D. montevidensis\_M2225*  
*D. argyraea\_P24134*  
*D. purpurascens\_K513*  
*D. purpurascens\_B27535*  
*D. montevidensis\_B27535(1)*  
*Ditaxis sp.\_C2005*  
*Ditaxis sp.\_K914*  
*D. grazielae\_K689*  
*D. grazielae\_K688*  
*D. desertorum\_K631*  
*D. desertorum\_K703*  
*D. malpighiaceae\_K692*  
*D. malpighiaceae\_K659*  
*D. adenophora\_W183*  
*D. adenophora\_G2010-37*  
*D. lanceolata\_N9950*  
*D. manzanilloana\_G2009-1003*  
*D. silviae\_S3496*  
*D. blodgettii\_C48121*  
*D. serrata\_S1709*  
*D. brandegeei\_R1529*  
*D. guatemalensis\_R1094*  
*D. fasciculata\_A2562*  
*D. fasciculata\_A3866*  
*D. polygama\_H18661*  
*D. dioica\_Q1760*  
*D. dioica\_V16411*  
*D. breviramea\_K563*  
*D. simoniana\_K482*  
*D. fasciculata\_A3866(1)*  
*D. sp.\_T12361*  
*A. sericea\_C48837*  
*A. sp.\_Ss.n.*  
*A. lucayana\_C44052*  
*A. lottiae\_R807*  
*A. lundellii\_R2033*  
*A. coatepensis\_G624*  
*A. moorei\_B69797*  
*D. heterantha\_R638*  
*D. pringlei\_R513*  
*D. cyanophylla\_T597*  
*D. mercurialina\_C32893*  
*Dijablonszkyanarr650*  
*D. malpighiphila\_K1245*  
*C. serrata\_M607*  
*C. sp.\_N2436*  
*C. castaneifolia\_K1042*  
*C. palustris\_K515*  
*C. palustris\_K511*  
*C.\_V788*  
*C. cordata\_Ss.n.*  
*C. intermedium\_K154*  
*C. ramboi\_C1719*  
*C. molle\_K207*  
*C. puntalobense\_K801*  
*C. griseum\_K1249*  
*C. griseum\_S1212*  
*C. quinquecupidatum\_H3534*  
*C. shideanum\_R1038*  
*C. shideanum\_H22645*  
*C. latifolium\_O672*  
*C. latifolium\_O672(1)*  
*C. latifolium\_Z12788*  
*C. latifolium\_K441*  
*C. latifolium\_K365*  
*C. tricoccum\_S322*  
*C. tricoccum\_K615*  
*C. phalacradenium\_K1315*  
*C. anisotrichum\_K210*  
*C. anisotrichum\_K148*  
*C. berterioanum\_Z8248*  
*C. canescens\_T608*  
*C. foliosum\_K230*  
*C. tricuspidatum\_T2036*  
*C. tricuspidatum\_T2036(1)*  
*C. argentinense\_C736*  
*C. argentinense\_K1248*  
*A. sp.\_N30013*  
*A. triloba\_E1676*  
*P. brasiliensis\_K1046*  
*P. brasiliensis\_K1213*  
*P. volubilis\_H3500*  
*P. penninervia\_W5996*

**Ditaxis**  
**Argythamnina**  
**Ditaxis**  
**Caperonia**  
**Chiropetalum**  
**Adelia**  
**Philyra**  
**Plukenetia**

**Plukenetia**

Figure S6: Consensus tree of the plastid markers (*trnL*-F+*trnT*+*petD*) obtained by Bayesian Inference performed in MrBayes. Numbers indicate Bayesian posterior probabilities.

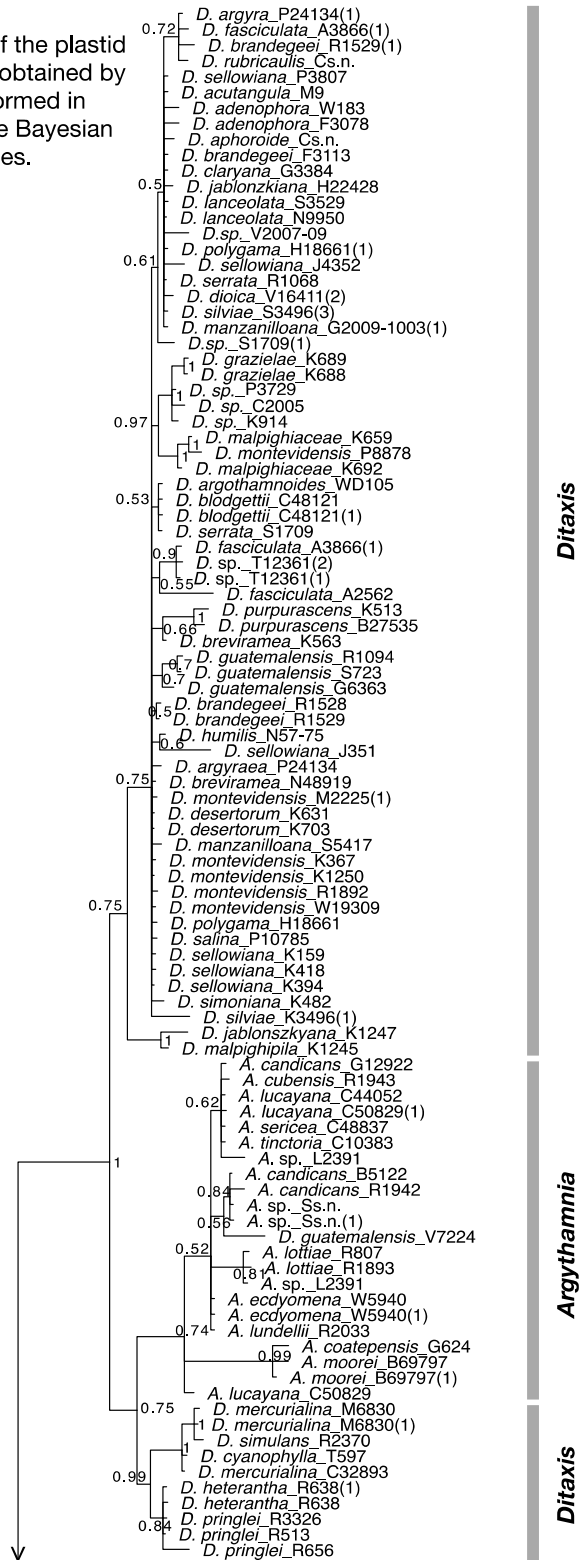

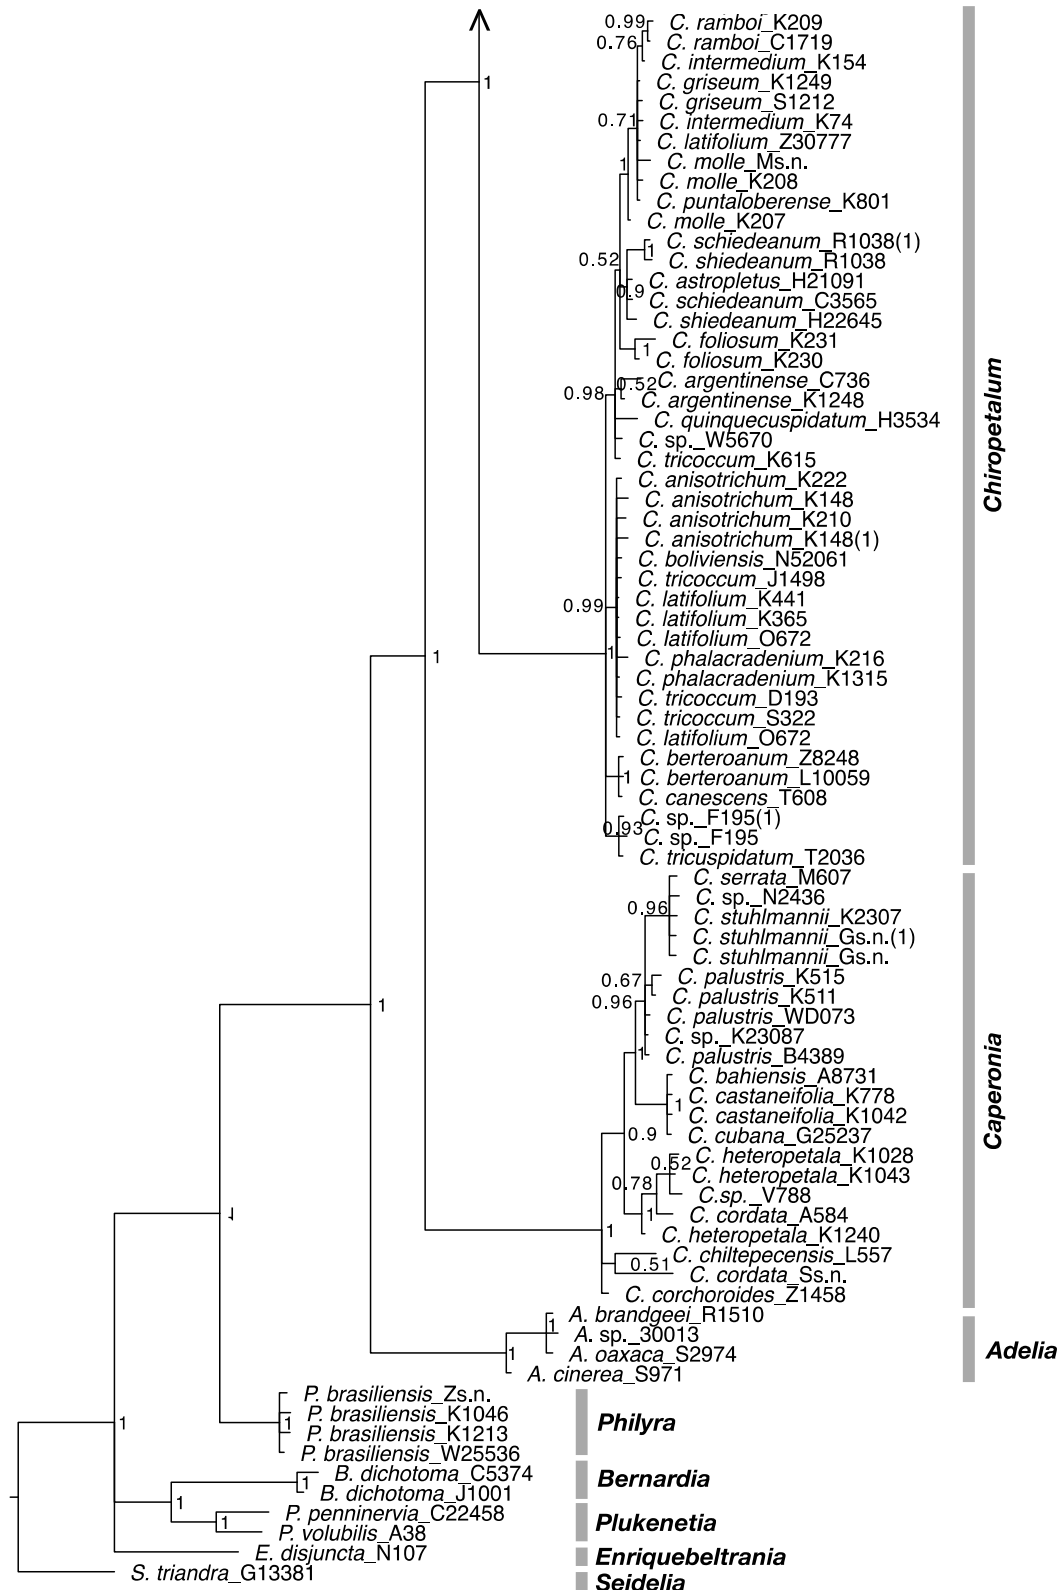

Figure S7: Consensus tree of the nuclear markers (*tITE+ETS*) obtained by Bayesian Inference performed in MrBayes. Numbers indicate Bayesian posterior probabilities.

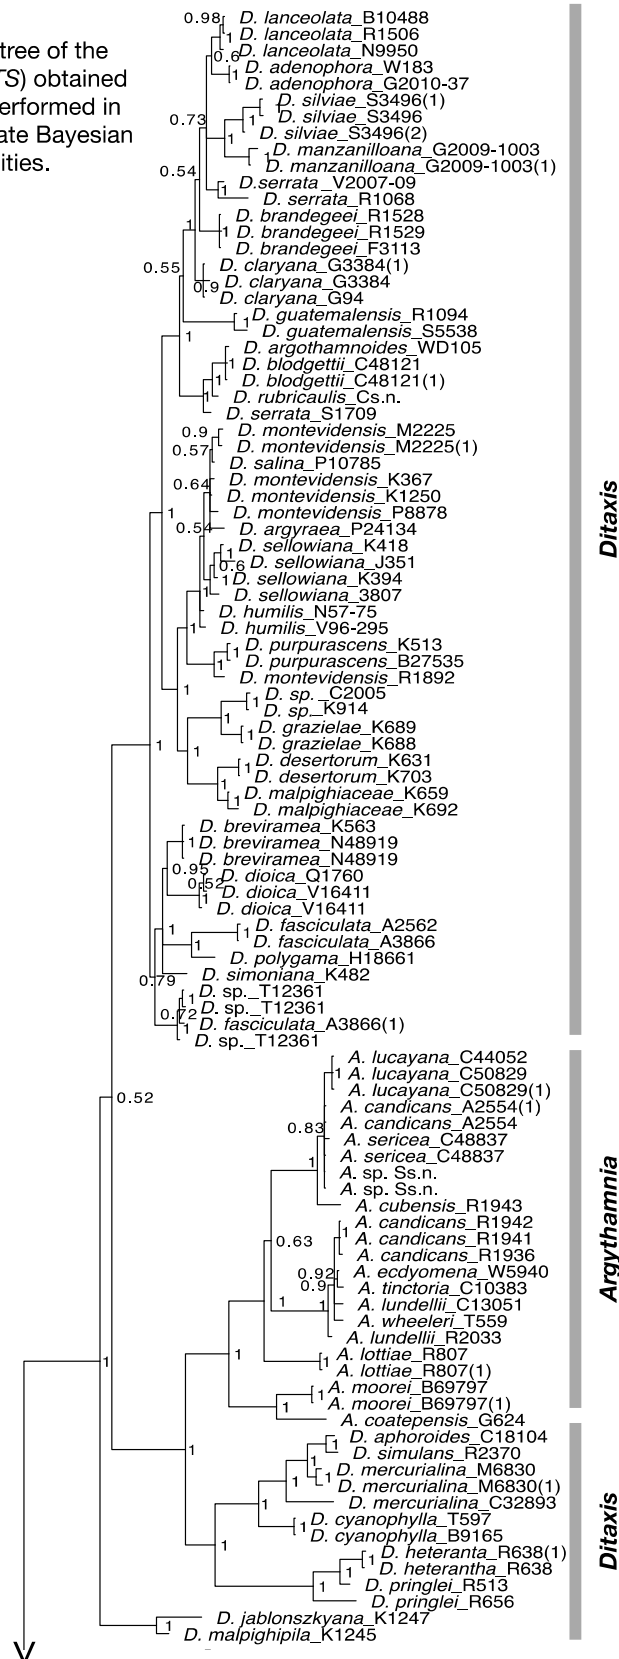

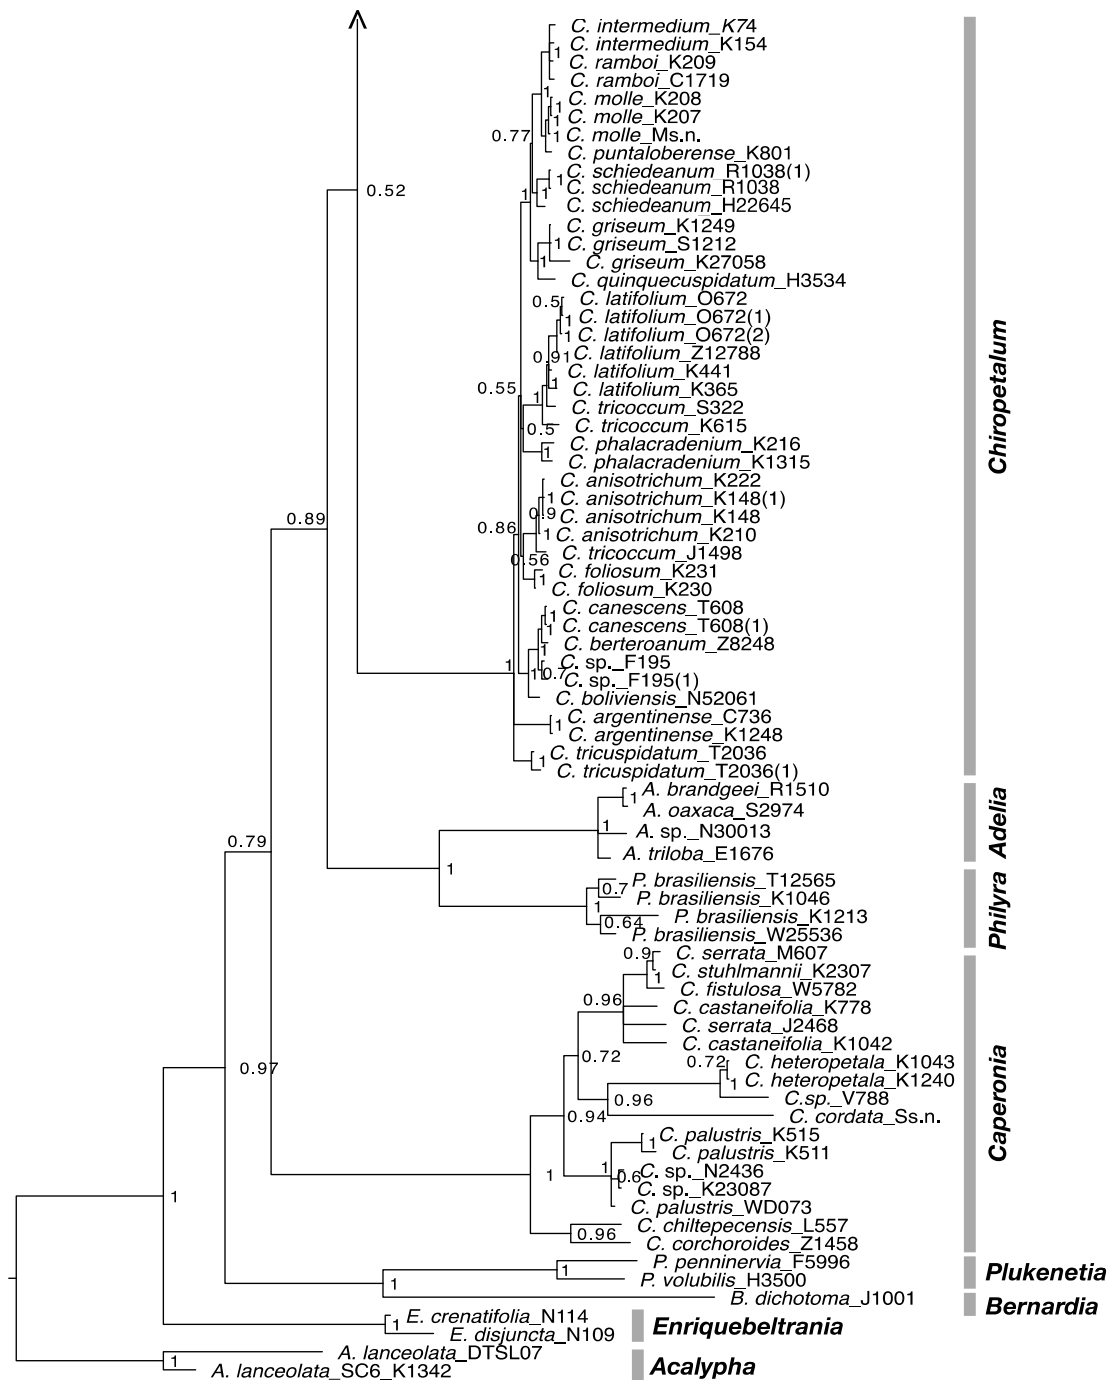

Figure S8: Consensus tree of all five markers combined obtained by Bayesian Inference performed in MrBayes. Numbers indicate Bayesian posterior probabilities.

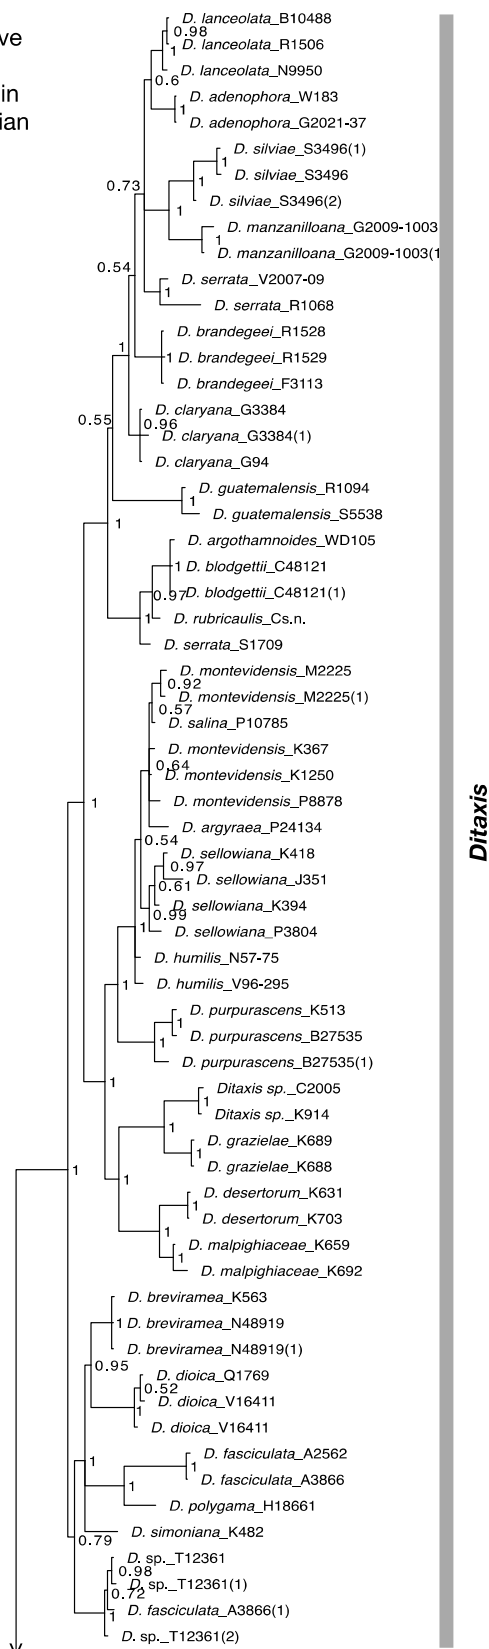



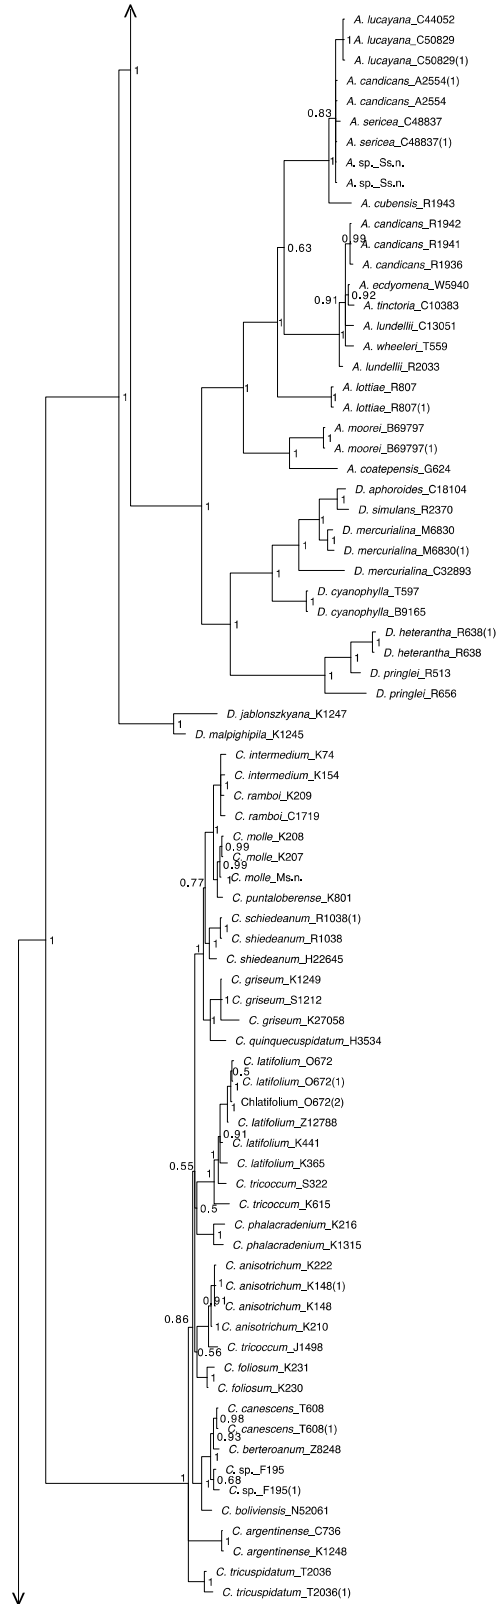

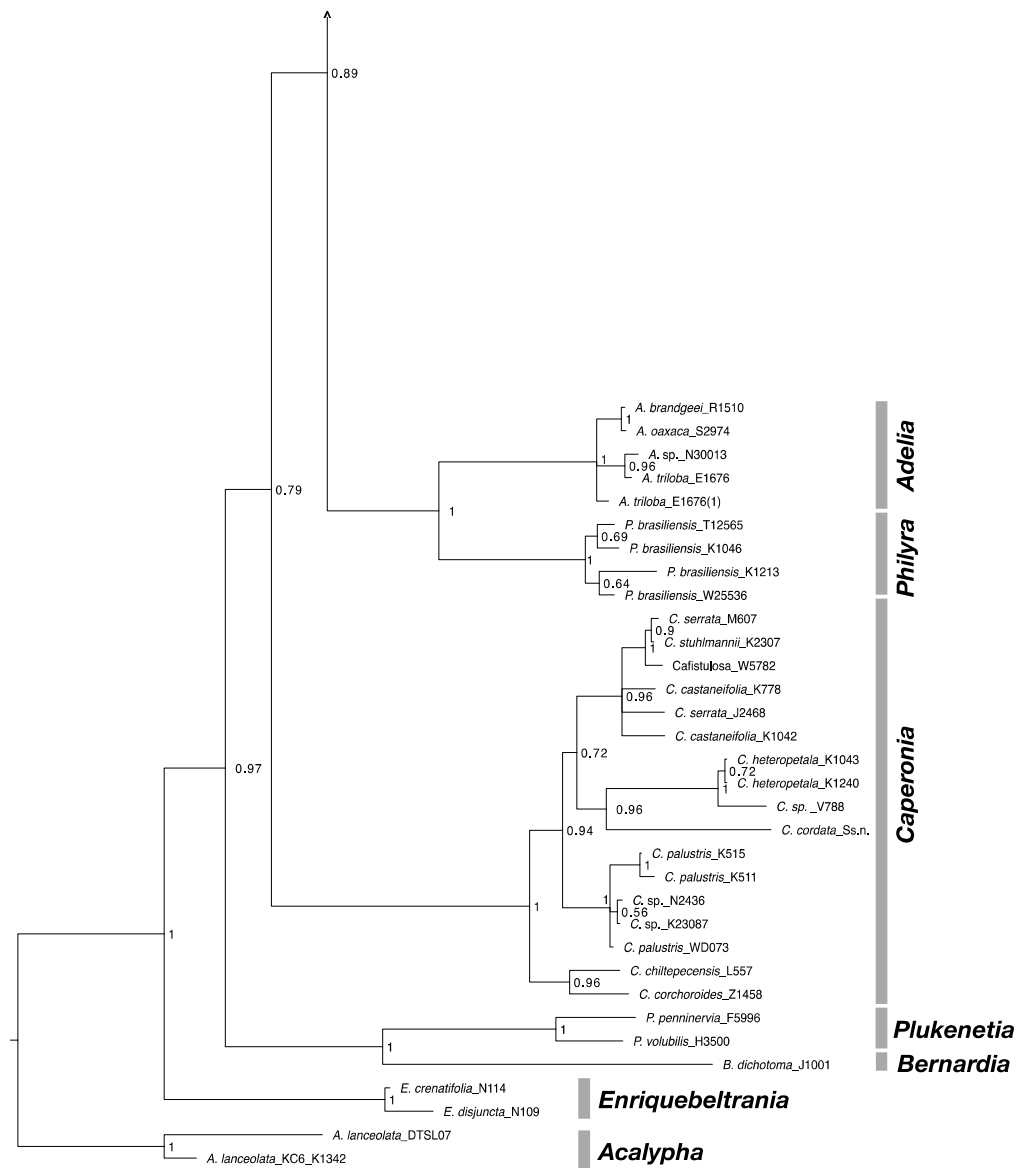

Figure S9: Phylogram of all markers combined data set resulting from the RaxML analysis. Numbers indicate the bootstrap support.

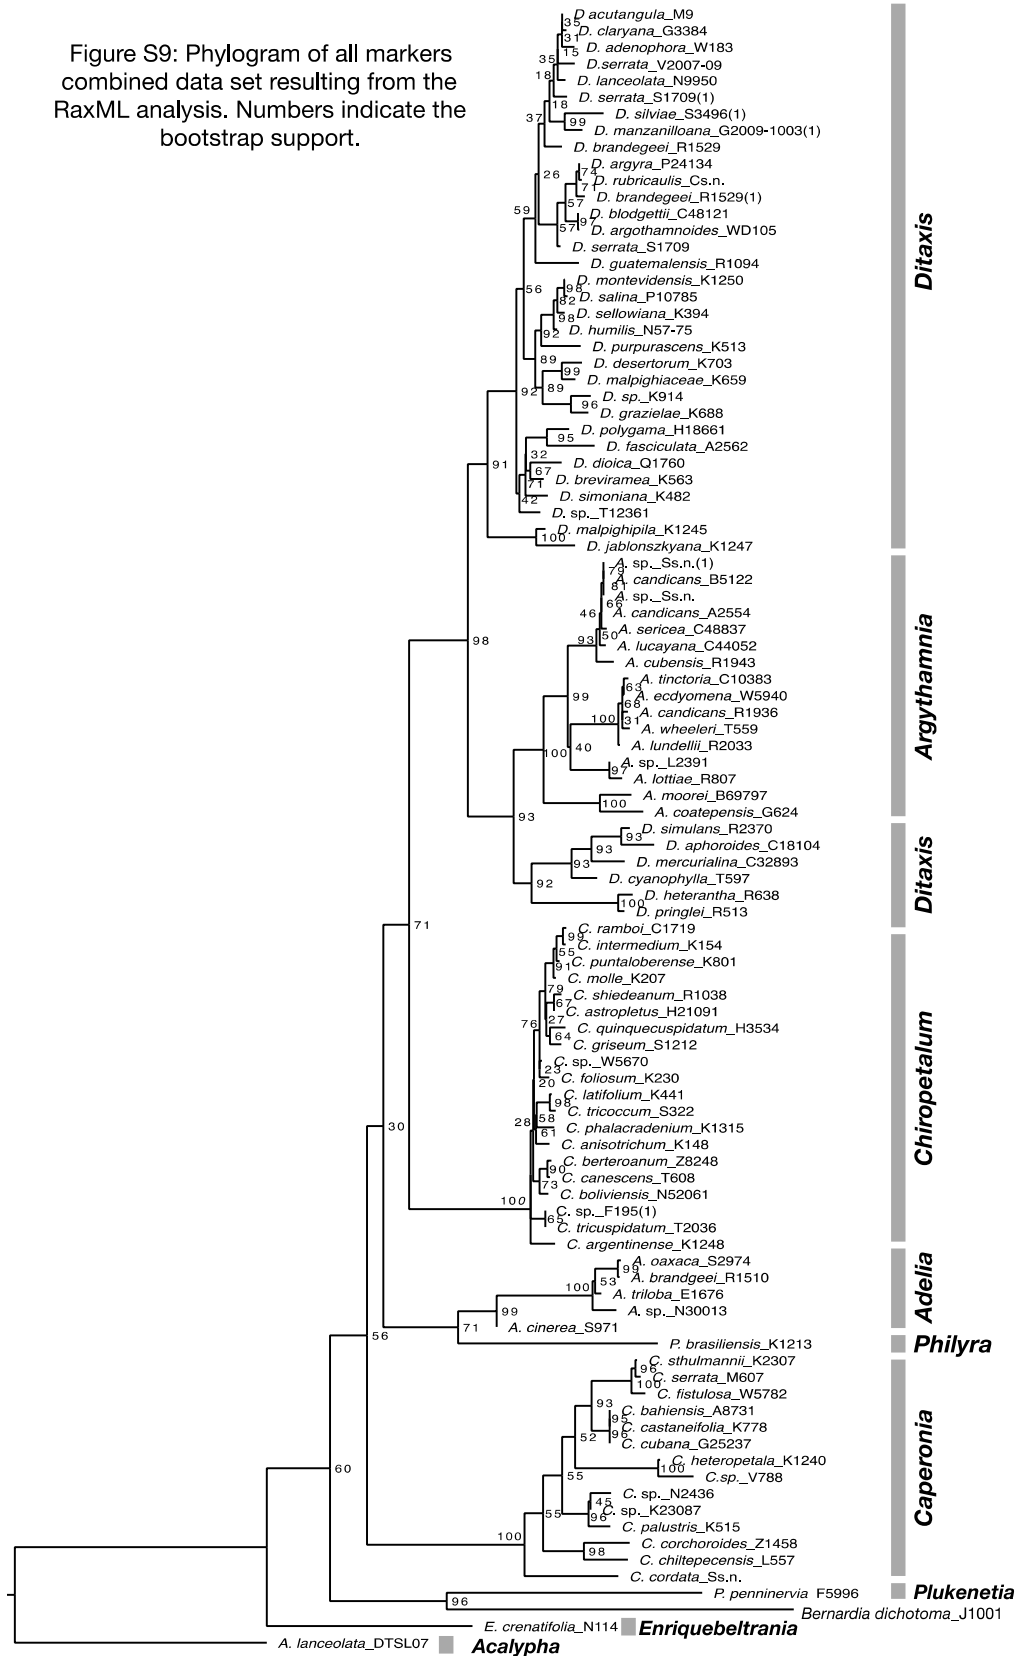

Supplement: s1 [file s1]
