# Supplementary material for: Systematics of Ditaxinae and Related Lineages within the Subfamily Acalyphoideae (Euphorbiaceae) Based on Molecular Phylogenetics
Source: MDPI journal article supplement (doi:10.3390/biology12020173), 2023-01-21
Supplement: s1 [file s1]

# SUPPLEMENTARY MATERIAL S1

## Systematics of Ditaxinae and related lineages within subfamily Acalyphoideae (Euphorbiaceae) based on molecular phylogenetics

Josimar Külkamp, Ricarda Riina, Yocupitzia Ramírez-Amezcu, João R.V. Iganci, Inês Cordeiro, Raquel González-Páramo, Sabina Irene Lara-Cabrera and José Fernando A. Baumgratz

**Supplementary material S1:** Supplementary table.

**TABLE S1:** Taxa, voucher information and accessions used in this study. GenBank's access numbers are presented in the columns of the molecular markers. The names of the taxa follow the topology of the trees, for the updated names, see the "taxonomic treatment" section of the manuscript.

| Taxa                                                                           | Samples precedence | DNA code     | Collector                                              | Country | Locality                                    | ITS        | ETS | <i>petD</i> | <i>trnLF</i> | <i>trnTL</i> |
|--------------------------------------------------------------------------------|--------------------|--------------|--------------------------------------------------------|---------|---------------------------------------------|------------|-----|-------------|--------------|--------------|
| <i>Acalypha lanceolata</i> Willd.                                              | Genbank            | SamKurukura  | S. Kurukura & A Hassan C6_K1342                        | Kenya   |                                             | MK261283.1 |     |             | MK261314.1   |              |
| <i>Acalypha lanceolata</i> Willd.                                              | Genbank            | DinhDuyVu    | Dinh Duy Vu et al. TSL07                               | Vietnam |                                             | MZ505521.1 |     |             | AY794762.1   |              |
| <i>Adelia brandegeei</i> V.W.Steitm.                                           | Silica             | YPR1510      | Y. Ramírez-Amezcu, V.W. Steinmann & Y. Yang 1510 (IEB) | Mexico  | Baja California Sur. Municipio de Los Cabos | OQ190564   |     |             | OQ151648     |              |
| <i>Adelia cinerea</i> (Wiggins & Rollins) A. Cerv., V.W. Steitm. & Flores Olv. | Genbank            | Steinmann971 | V. Steinmann 971 (MEXU)                                | Mexico  |                                             |            |     | HG97197.2   | HG97180.5    |              |

|                                                       |           |              |                                                                            |                |                                          |          |              |           |                      |          |
|-------------------------------------------------------|-----------|--------------|----------------------------------------------------------------------------|----------------|------------------------------------------|----------|--------------|-----------|----------------------|----------|
| <i>Adelia oxacana</i><br>(Müll.Arg.) Hemsl.           | Silica    | Stei2974     | V.W. Steinmann 2974<br>(IEB)                                               | Mexico         | Michoacán.<br>Municipio de<br>La Huacana | OQ190565 |              |           | OQ151649             |          |
| <i>Adelia</i> sp.                                     | Herbarium | rr673        | M. Nee 30013 (MA)                                                          | Mexico         | Veracruz,<br>Mun.<br>Hidalgotitlan       | OQ190567 | OQ18362<br>2 |           | OQ151650             | OQ116469 |
| <i>Adelia triloba</i> (Müll.Arg.)<br>Hemsl.           | Herbarium | rr674        | R. Espinoza 1676<br>(MA)                                                   | Costa<br>Rica  | Guanacaste,<br>Liberia                   | OQ190566 | OQ18362<br>1 |           |                      |          |
| <i>Argythamnia candicans</i> Sw.                      | Genbank   | Gillis12922  | W.T. Gillis 12922 (B)                                                      | Bahamas        |                                          |          |              | HG97198.4 | HG97181.7            |          |
| <i>Argythamnia candicans</i> Sw.                      | Genbank   | GBBorsch5122 | T. Borsch et al. 5122<br>(B)                                               | Cuba           |                                          |          |              | HG97198.5 | HG97181.8            |          |
| <i>Argythamnia candicans</i> Sw.                      | Herbarium | 78           | Y. Ramírez-Amezcu<br>a et al. 1942 (IEB)                                   | Cuba           | Santiago                                 | OQ190570 |              |           |                      |          |
| <i>Argythamnia candicans</i> Sw.                      | Herbarium | 79           | Y. Ramírez-Amezcu<br>a et al. 1941 (IEB)                                   | Cuba           | Gibara                                   | OQ190571 |              |           |                      |          |
| <i>Argythamnia candicans</i> Sw.                      | Herbarium | 80           | Y. Ramírez-Amezcu<br>a et al. 1936 (IEB)                                   | Cuba           | Cienfuegos                               | OQ190572 |              |           |                      |          |
| <i>Argythamnia candicans</i> Sw.                      | Herbarium | YPRPR        | F. Axelrod et al. 2554<br>(NY)                                             | Puerto<br>Rico | Isabella                                 | OQ190569 |              |           |                      |          |
| <i>Argythamnia candicans</i> Sw.                      | Herbarium | YPR          | F. Axelrod et al. 2554<br>(NY)                                             | Puerto<br>Rico | Isabella                                 | OQ190573 |              |           | OQ151652             |          |
| <i>Argythamnia coatepensis</i><br>(Brandegge) Croizat | Silica    | rr579        | G.J. Garcia & C.A.C.<br>Espinosa 624 (NY)                                  | México         | Oaxaca                                   | OQ190574 | OQ18362<br>4 |           | OQ151653<br>OQ151654 |          |
| <i>Argythamnia cubensis</i><br>Britton & P.Wilson     | Silica    | YPR1943      | Y. Ramírez-Amezcu<br>a, J.A. Pérez-Camacho &<br>M. Cañizares 1943<br>(IEB) | Cuba           | Provincia de<br>Santiago de<br>Cuba      | OQ190575 |              |           | OQ151655             |          |
| <i>Argythamnia ecdyomena</i><br>J.W.Ingram            | Silica    | rr580        | B. Wallnofer & F.M.<br>Tut-Tesucum 5940<br>(NY)                            | Guatemal<br>a  | Petén, San<br>Andrés                     | OQ190576 | OQ18362<br>5 |           | OQ151656             |          |

|                                            |           |         |                                                     |                   |                                      |                      |              |  |                                  |          |
|--------------------------------------------|-----------|---------|-----------------------------------------------------|-------------------|--------------------------------------|----------------------|--------------|--|----------------------------------|----------|
| <i>Argythamnia ecdyomena</i><br>J.W.Ingram | Silica    | YPR5940 | B. Wallnofer & F.M.<br>Tut-Tesucum 5940 (1)<br>(NY) | Guatemala         | Petén, San<br>Andrés                 |                      |              |  | OQ151657                         |          |
| <i>Argythamnia lottiae</i> J.W.Ingram      | Herbarium | rr581   | Y. Ramírez-Amezcu<br>et al. 807 (IEB)               | México            | Jalisco, La<br>Huerta,<br>Manzanilla | OQ190577             | OQ18362<br>6 |  | OQ151658                         |          |
| <i>Argythamnia lottiae</i> J.W.Ingram      | Silica    | y100    | Y. Ramírez-Amezcu<br>et al. 807 (1) (IEB)           | Mexico            | Michoacán                            | OQ190578             |              |  |                                  |          |
| <i>Argythamnia lottiae</i> J.W.Ingram      | Herbarium | y144    | Y. Ramírez-Amezcu<br>& V.W. Steinmann<br>1893 (IEB) | Mexico            | Guerrero                             | OQ190579             |              |  | OQ151659                         |          |
| <i>Argythamnia lucayana</i><br>Millsp.     | Herbarium | rr582   | D.S. Correll 44052<br>(NY)                          | Bahamas           | Exuma, Gran<br>Exuma                 | OQ190580             | OQ18362<br>7 |  | OQ151660<br>OQ151661<br>OQ151662 |          |
| <i>Argythamnia lucayana</i><br>Millsp.     | Herbarium | y83     | D.S. Correll 50829<br>(NY)                          | Bahama<br>Islands | Great Exuma                          | OQ190581             |              |  |                                  | OQ116470 |
| <i>Argythamnia lucayana</i><br>Millsp.     | Herbarium | YPR     | D.S. Correll 50829 (1)<br>(NY)                      | Bahama<br>Islands | Great Exuma                          | OQ190582             |              |  | OQ151663                         |          |
| <i>Argythamnia lundellii</i> J.W.Ingram    | Herbarium | rr583   | Y. Ramírez-Amezcu<br>et al. 2033 (MEXU)             | México            | Yucatán,<br>Chichén Itzá             | OQ190583             | OQ18362<br>8 |  | OQ151664<br>OQ151665             |          |
| <i>Argythamnia lundellii</i> J.W.Ingram    | Herbarium | y96     | Cabrera 13051 (XAL)                                 | México            | Quintana Roo                         | OQ190584             |              |  | OQ151666                         |          |
| <i>Argythamnia moorei</i><br>J.W.Ingram    | Herbarium | rr584   | D.E. Breedlove 69797<br>(CAS)                       | México            | Chiapas                              | OQ190585             | OQ18362<br>9 |  | OQ151667                         | OQ116471 |
| <i>Argythamnia moorei</i><br>J.W.Ingram    | Herbarium | YPR     | D.E. Breedlove 69797<br>(1) (CAS)                   | México            | Chiapas                              | OQ190586             |              |  | OQ151668                         |          |
| <i>Argythamnia sericea</i> Griseb.         | Herbarium | rr585   | D.S. Correll & G.R.<br>Proctor 48837 (US)           | Bahamas           | Long Cay,<br>Crooked<br>Island       | OQ190587<br>OQ190588 | OQ18363<br>0 |  | OQ151669<br>OQ151670             |          |
| <i>Argythamnia sericea</i> Griseb.         | Herbarium | YPR     | D.S. Correll & G.R.<br>Proctor 48837 (1) (US)       | Bahamas           | Long Cay,<br>Crooked<br>Island       | OQ190589             |              |  | OQ151671                         |          |

|                                                |           |             |                                                |                    |                                           |            |              |           |                      |          |
|------------------------------------------------|-----------|-------------|------------------------------------------------|--------------------|-------------------------------------------|------------|--------------|-----------|----------------------|----------|
| <i>Argythamnia</i> sp.                         | Herbarium | rr586       | V.W. Steinmann s.n. (IEB)                      | USA                | St. Croix Island                          | OQ190590   | OQ18363<br>1 |           | OQ151672<br>OQ151673 | OQ116472 |
| <i>Argythamnia</i> sp.                         | Genbank   | Lott2391    | E. Lott 2391 (MEXU)                            | Mexico             |                                           |            |              | HG97203.4 | HG97186.7            |          |
| <i>Argythamnia</i> sp.                         | Sílica    | StCrYPR     | V.W. Steinmann s.n. (IEB)                      | USA                | St. Croix Island                          | OQ190591   |              |           | OQ151674             |          |
| <i>Argythamnia tinctoria</i> Millsp.           | Silica    | rr587       | E. Contreras 10383 (US)                        | Guatemala          | Petén, San Francisco, San Juan            | OQ190592   | OQ18363<br>3 |           | OQ151675             |          |
| <i>Argythamnia wheeleri</i> J.W.Ingram         | Herbarium | YPR         | J.C. Trejo et al. 559 (XAL)                    | México             | Yucatán                                   | OQ190593   |              |           | OQ151676             |          |
| <i>Bernardia dichotoma</i> (Willd.) Müll.Arg.  | Genbank   | Jestrow1001 | B. Jestrow 1001 (FTG)                          | Jamaica            |                                           | GU000029.1 |              |           | EF470582.1           |          |
| <i>Bernardia dichotoma</i> (Willd.) Müll.Arg.  | Genbank   | Clase5374   | T. Clase et al. 5374 (JBSD)                    | Dominican Republic |                                           |            |              |           | HG971822.1           |          |
| <i>Caperonia bahiensis</i> Müll.Arg.           | Silica    | rr588       | M. Arbo 8731 (BA)                              | Argentina          | Corrientes, Corrientes                    |            |              |           | OQ151677             |          |
| <i>Caperonia castaneifolia</i> (L.) A.St.-Hil. | Silica    | rr590       | J. Külkamp 778 (RB)                            | Brasil             | Río de Janeiro, Squarema                  | OQ190594   |              |           | OQ151678             | OQ116521 |
| <i>Caperonia castaneifolia</i> (L.) A.St.-Hil. | Silica    | rr591       | J. Külkamp 1042 (RB)                           | Brasil             | Espírito Santo, Sooretama, Lagoa Juparana |            | OQ18363<br>5 |           | OQ151679             |          |
| <i>Caperonia chiltepecensis</i> Croizat        | Silica    | rr593       | R.L. Luna 557 (NY)                             | Mexico             | Oaxaca                                    | OQ190595   |              |           | OQ151680             |          |
| <i>Caperonia corchoroides</i> Müll.Arg.        | Silica    | rr594       | D. Zappi et al. 1458 (NY)                      | Brasil             | Mato Grosso, Nuevo Mundo                  | OQ190596   |              |           | OQ151681             |          |
| <i>Caperonia cordata</i> A.St.-Hil.            | Silica    | rr592       | J. Schaefer & S.A. Bordignon s.n. (ICN-193858) | Brasil             | Río Grande do Sul, Unistalda, Porteirinha | OQ190712   | OQ18363<br>6 | OQ151622  | OQ151682             | OQ116522 |
| <i>Caperonia cordata</i> A.St.-Hil.            | Silica    | rr595       | Aliscioni et al. 584 (SI)                      | Argentina          | Formosa, Formosa                          |            |              |           | OQ151683             |          |

|                                            |           |               |                             |          |                                           |                      |                      |            |            |          |
|--------------------------------------------|-----------|---------------|-----------------------------|----------|-------------------------------------------|----------------------|----------------------|------------|------------|----------|
| <i>Caperonia cubana</i> Pax & K.Hoffm.     | Genbank   | Greuter25237  | W. Greuter et al. 25237 (B) | Cuba     |                                           |                      |                      | HG97199.8  | HG97183.1  |          |
| <i>Caperonia fistulosa</i> Beille          | Herbarium | IS2024        | De Witte 5782 (MO)          | Congo    |                                           | OQ190724             |                      |            |            |          |
| <i>Caperonia heteropetala</i> Didr.        | Silica    | rr596         | J. Külkamp 1028 (RB)        | Brasil   | Espírito Santo, Linhares, Vale do Suruaca | OQ190713             |                      | OQ151623   | OQ151684   | OQ116523 |
| <i>Caperonia heteropetala</i> Didr.        | Silica    | rr597         | J. Külkamp 1043 (RB)        | Brasil   | Espírito Santo, Sooretama, Lagoa Juparana | OQ190715             |                      | OQ151624   | OQ151685   | OQ116524 |
| <i>Caperonia heteropetala</i> Didr.        | Silica    | rr598         | J. Külkamp 1240 (RB)        | Brasil   | Rio de Janeiro, Silva Jardim              | OQ190716             |                      |            | OQ151686   | OQ116525 |
| <i>Caperonia</i> sp.                       | Silica    | rr599         | E. Valduga et al. 788 (ICN) | Brasil   | Rio Grande do Sul, Torres, Itapeva        | OQ190717             | OQ18363 <sub>7</sub> |            | OQ151687   | OQ116526 |
| <i>Caperonia palustris</i> (L.) A.St.-Hil. | Silica    | rr601         | J. Külkamp 515 (RB)         | Brasil   | Mato Grosso do Sul, Corumbá               | OQ190718<br>OQ190719 | OQ18363 <sub>8</sub> | OQ151625   | OQ151688   | OQ116527 |
| <i>Caperonia palustris</i> (L.) A.St.-Hil. | Silica    | rr602         | J. Külkamp 511 (RB)         | Brasil   | Mato Grosso do Sul, Guia Lopes da Laguna  | OQ190714             | OQ18364 <sub>1</sub> | OQ151626   | OQ151692   | OQ116531 |
| <i>Caperonia palustris</i> (L.) A.St.-Hil. | Genbank   | HG9719991     | T. Borsch et al. 4389 (B)   | Cuba     |                                           |                      |                      | HG971999.1 | HG97183.2  |          |
| <i>Caperonia palustris</i> (L.) A.St.-Hil. | Genbank   | GBWurdackD073 | K. Wurdack D073 (US)        |          |                                           | MK780933.1           |                      |            | AY794745.1 |          |
| <i>Caperonia serrata</i> (Turcz.) C.Presl. | Herbarium | IS2020        | Jongkind 2468 (MO)          | Ghana    |                                           | OQ190723             |                      |            |            |          |
| <i>Caperonia serrata</i> (Turcz.) C.Presl. | Herbarium | IS2023        | Mahlangu 607 (MO)           | Zimbabwe |                                           | OQ190720             | OQ18363 <sub>9</sub> |            | OQ151689   | OQ116528 |
| <i>Caperonia</i> sp.                       | Herbarium | IS2027        | Nsiownde 2436 (MO)          | Congo    |                                           | OQ190721             | OQ18364 <sub>0</sub> |            | OQ151690   | OQ116529 |

|                                                             |                 |             |                                                       |            |                                                        |          |                      |          |            |          |
|-------------------------------------------------------------|-----------------|-------------|-------------------------------------------------------|------------|--------------------------------------------------------|----------|----------------------|----------|------------|----------|
| <i>Caperonia</i> sp.                                        | Herbarium       | IS2028      | Kuchar 23087 (MO)                                     | Tanzania   |                                                        | OQ190722 |                      |          | OQ151691   | OQ116530 |
| <i>Caperonia stuhlmannii</i> Pax                            | Herbarium       | IS2026      | Kayombo 2307 (MO)                                     | Tanzania   |                                                        | OQ190725 |                      |          | OQ151693   | OQ116532 |
| <i>Caperonia stuhlmannii</i> Pax                            | Genbank         | GBJG16P06A2 | J. Guyton & B. Wursten s.n. (no collection cited)     | Mozambique | Sofala, Gorongosa, Gorongos, National Park, Lion House |          |                      |          | MK186998.1 |          |
| <i>Caperonia stuhlmannii</i> Pax                            | Genbank         | GBJG16P01E9 | J. Guyton & B. Wursten (1) s.n. (no collection cited) | Mozambique | Sofala, Gorongosa, Gorongos, National Park, Lion House |          |                      |          | MK186999.1 |          |
| <i>Chiropetalum anisotrichum</i> (Müll.Arg.) Pax & K.Hoffm. | Silica          | rr604       | J. Külkamp et al. 210 (HUEFS)                         | Brasil     | Santa Catarina, Lauro Müller                           | OQ190599 | OQ18364 <sub>2</sub> | OQ151627 | OQ151696   | OQ116474 |
| <i>Chiropetalum anisotrichum</i> (Müll.Arg.) Pax & K.Hoffm. | Silica          | rr605       | J. Külkamp et al. 148 (ICN)                           | Brasil     | Santa Catarina, Florianópolis                          | OQ190600 | OQ18364 <sub>3</sub> | OQ151628 | OQ151697   | OQ116475 |
| <i>Chiropetalum anisotrichum</i> (Müll.Arg.) Pax & K.Hoffm. | Külkamp-Masters | K3          | J. Külkamp et al. 222 (ICN)                           | Brasil     | Rio Grande do Sul, Pareci Novo                         | OQ190597 |                      |          | OQ151694   |          |
| <i>Chiropetalum anisotrichum</i> (Müll.Arg.) Pax & K.Hoffm. | Külkamp-Masters | K4          | J. Külkamp et al.148 (ICN)                            | Brasil     | Santa Catarina, Florianópolis                          | OQ190598 |                      |          | OQ151695   |          |
| <i>Chiropetalum argentinense</i> Skottsbo.                  | Silica          | rr606       | L. Carbone 736 (ACOR)                                 | Argentina  | Córdoba, Córdoba capital                               | OQ190601 | OQ18364 <sub>4</sub> | OQ151629 | OQ151698   | OQ116473 |
| <i>Chiropetalum argentinense</i> Skottsbo.                  | Silica          | rr612       | J. Külkamp 1248 (BA)                                  | Argentina  | Córdoba, Reserva General San Martín                    | OQ190602 | OQ18364 <sub>5</sub> | OQ151630 | OQ151699   | OQ116476 |

|                                                                     |                 |       |                                   |           |                                                         |          |              |          |          |          |
|---------------------------------------------------------------------|-----------------|-------|-----------------------------------|-----------|---------------------------------------------------------|----------|--------------|----------|----------|----------|
| <i>Chiropetalum astroplethos</i> (J.W.Ingram) Radcl.-Sm. & Govaerts | Herbarium       | YPRY7 | Hinton et al. 21091 (IEB)         | Mexico    | Coahuila. Ramos Arizpe                                  |          |              |          | OQ151700 |          |
| <i>Chiropetalum berterianum</i> Schltl.                             | Herbarium       | YPR   | L.R. Landrum et al. 10059 (NY)    | Chile     | Region Met, Santiago                                    |          |              |          | OQ151701 |          |
| <i>Chiropetalum berterianum</i> var. <i>psiladenium</i> Skottsbo.   | Herbarium       | rr607 | O. Zollner 8248 (NY)              | Chile     | Coquimbo, Guanaqueros, near of coast                    | OQ190603 | OQ18364<br>6 | OQ151631 | OQ151702 | OQ116477 |
| <i>Chiropetalum boliviense</i> (Müll.Arg.) Pax & K.Hoffm.           | Herbarium       | YPRTR | M. Nee et al. 52061 (NY)          | Bolivia   | Depto Santa Cruz. Prov. Florida, Parque Nacional Amboró | OQ190604 |              |          | OQ151703 |          |
| <i>Chiropetalum canescens</i> (Phil.) F.Phil.                       | Herbarium       | rr609 | S. Teillier 608 (NY)              | Chile     | Antofagasta, Antofagasta                                | OQ190605 | OQ18364<br>7 |          | OQ151704 | OQ116478 |
| <i>Chiropetalum canescens</i> (Phil.) F.Phil.                       | Herbarium       | y82   | S. Teillier 608 (1) (NY)          | Chile     | Antofagasta, Antofagasta                                | OQ190606 |              |          |          |          |
| <i>Chiropetalum foliosum</i> Pax & K.Hoffm                          | Silica          | rr610 | J. Külkamp et al. 230 (ICN)       | Brasil    | Rio Grande do Sul, Porto Alegre                         | OQ190608 | OQ18364<br>8 | OQ151632 | OQ151706 | OQ116479 |
| <i>Chiropetalum foliosum</i> Pax & K.Hoffm                          | Külkamp-Masters | K1    | J. Külkamp et al. 231 (ICN)       | Brasil    | Rio Grande do Sul, Porto Alegre                         | OQ190607 |              |          | OQ151705 |          |
| <i>Chiropetalum griseum</i> Griseb.                                 | Silica          | rr611 | J. Külkamp 1249 (BA)              | Argentina | Córdoba, Reserva General San Martín                     | OQ190609 | OQ18364<br>9 | OQ151633 | OQ151707 | OQ116480 |
| <i>Chiropetalum griseum</i> Griseb.                                 | Silica          | rr613 | M.P. Suarez Santillán 1212 (ACOR) | Argentina | Córdoba, Pocho                                          | OQ190610 | OQ18365<br>0 | OQ151634 | OQ151708 | OQ116481 |
| <i>Chiropetalum griseum</i> Griseb.                                 | Herbarium       | YPR54 | Krapovickas et al. 27058 (MO)     | Argentina | Corrientes, Corrientes                                  | OQ190611 |              |          |          |          |

|                                                                   |                 |                |                                         |          |                                    |          |                      |           |           |          |
|-------------------------------------------------------------------|-----------------|----------------|-----------------------------------------|----------|------------------------------------|----------|----------------------|-----------|-----------|----------|
| <i>Chiropetalum intermedium</i><br>Pax & K.Hoffm.                 | Silica          | rr614          | J. Külkamp et al. 154<br>(ICN)          | Brasil   | Río Grande do Sul, Caçapava do Sul | OQ190614 | OQ18365 <sub>1</sub> | OQ151635  | OQ151711  | OQ116483 |
| <i>Chiropetalum intermedium</i><br>Pax & K.Hoffm.                 | Külkamp-Masters | K2             | J. Külkamp et al. 74<br>(ICN)           | Brasil   | Río Grande do Sul, Caçapava do Sul | OQ190613 |                      |           | OQ151710  |          |
| <i>Chiropetalum latifolium</i><br>(Chodat & Hassl.) Külkamp       | Silica          | rr615          | J. Külkamp et al. 441<br>(ICN)          | Brasil   | Río Grande do Sul, Derrubadas      | OQ190615 | OQ18365 <sub>2</sub> | OQ151636  | OQ151712  | OQ116484 |
| <i>Chiropetalum latifolium</i><br>(Chodat & Hassl.) Külkamp       | Silica          | rr616          | J. Külkamp et al. 365<br>(ICN)          | Brasil   | Río Grande do Sul, Quaraí          | OQ190616 | OQ18365 <sub>3</sub> | OQ151637  | OQ151713  | OQ116485 |
| <i>Chiropetalum latifolium</i><br>(Chodat & Hassl.) Külkamp       | Herbarium       | rr617          | Ortiz & E. Zardini 672<br>(MO)          | Paraguay | Paraguarí, Mbatovi Santo Tomás     | OQ190617 | OQ18365 <sub>4</sub> | OQ151638  | OQ151714  |          |
| <i>Chiropetalum latifolium</i><br>(Chodat & Hassl.) Külkamp       | Herbarium       | y80            | E. Zardini et al. 12788<br>(MO)         | Paraguay | Paraguarí                          |          | OQ18365 <sub>9</sub> |           |           |          |
| <i>Chiropetalum latifolium</i><br>(Chodat & Hassl.) Külkamp       | Genbank         | GBZardini30777 | E. Zardini & T. Tilleria<br>30777 (B)   | Paraguay |                                    |          |                      | HG97200.5 | HG97183.8 |          |
| <i>Chiropetalum latifolium</i><br>(Chodat & Hassl.) Külkamp       | Herbarium       | y89            | Ortiz & E. Zardini 672<br>(MO)          | Paraguay |                                    | OQ190634 | OQ18366 <sub>3</sub> |           |           | OQ116493 |
| <i>Chiropetalum latifolium</i><br>(Chodat & Hassl.) Külkamp       | Herbarium       | YPR            | Ortiz & E. Zardini 672<br>(1) (MO)      | Paraguay |                                    | OQ190635 |                      |           |           |          |
| <i>Chiropetalum molle</i><br>(Klotzsch ex. Baill.) Pax & K.Hoffm. | Silica          | rr618          | J. Külkamp et al. 207<br>(ICN)          | Brasil   | Santa Catarina, Urupema            | OQ190620 | OQ18365 <sub>5</sub> | OQ151639  | OQ151717  | OQ116486 |
| <i>Chiropetalum molle</i><br>(Klotzsch ex. Baill.) Pax & K.Hoffm. | Külkamp-Masters | K5             | A. Melo & M. Grins<br>s.n. (ICN-197014) | Brasil   | Rio Grande do Sul, Bagé            | OQ190618 |                      |           | OQ151715  |          |
| <i>Chiropetalum molle</i><br>(Klotzsch ex. Baill.) Pax & K.Hoffm. | Külkamp-Masters | K6             | J. Külkamp et al. 208<br>(ICN)          | Brasil   | Santa Catarina, Urupema            | OQ190619 |                      |           | OQ151716  |          |
| <i>Chiropetalum phalacradenium</i>                                | Silica          | rr619          | J. Külkamp et al. 1315<br>(RB)          | Brasil   | Santa Catarina,                    | OQ190622 | OQ18365 <sub>6</sub> | OQ151640  | OQ151719  | OQ116487 |



|                                                                   |                 |                |                                        |         |                                                      |          |                      |          |            |          |
|-------------------------------------------------------------------|-----------------|----------------|----------------------------------------|---------|------------------------------------------------------|----------|----------------------|----------|------------|----------|
| (J.W.Ingram) L.B.Sm. & Downs                                      |                 |                |                                        |         | Anitápolis, Trilha dos Índios                        |          |                      |          |            |          |
| <i>Chiropetalum phalacradenium</i> (J.W.Ingram) L.B.Sm. & Downs   | Külkamp-Masters | K7             | J. Külkamp et al. 216 (ICN)            | Brasil  | Santa Catarina, Lauro Müller, Serra do Rio do Rastro | OQ190621 |                      |          | OQ151718   |          |
| <i>Chiropetalum puntaloberense</i> Alonso Paz & Bassagoda         | Silica          | rr620          | J. Külkamp 801 (RB)                    | Uruguay | Rocha, La Coronilla                                  | OQ190623 | OQ18365 <sub>7</sub> | OQ151641 | OQ151721   | OQ116488 |
| <i>Chiropetalum quinquecuspidatum</i> (A.Juss.) Pax & K.Hoffm.    | Silica          | rr621          | L. Hoogte & C. Roersch 3534 (NY)       | Perú    | Puno, Sandia                                         | OQ190624 | OQ18366 <sub>7</sub> | OQ151642 | OQ151722   | OQ116489 |
| <i>Chiropetalum ramboi</i> (Allem & Irgang) Radcl.-Sm. & Govaerts | Silica          | rr622          | J. Carrion 1719 (HUEFS)                | Brasil  | Río Grande do Sul, Torres                            | OQ190626 | OQ18365 <sub>8</sub> | OQ151643 | OQ151724   | OQ116490 |
| <i>Chiropetalum ramboi</i> (Allem & Irgang) Radcl.-Sm. & Govaerts | Külkamp-Masters | K8             | J. Külkamp et al. 209 (ICN)            | Brasil  | Río Grande do Sul, Torres                            | OQ190625 |                      |          | OQ151723   |          |
| <i>Chiropetalum schiedeanum</i> (Müll.Arg.) Pax                   | Silica          | rr623          | Y. Ramirez-Amezcu et al. 1038 (NY)     | México  | Morelos                                              | OQ190628 | OQ18366 <sub>0</sub> | OQ151644 | OQ151726   | OQ116491 |
| <i>Chiropetalum schiedeanum</i> (Müll.Arg.) Pax                   | Silica          | YPRY2          | Y. Ramirez-Amezcu et al. 1038 (1) (NY) | México  | Morelos                                              | OQ190627 |                      |          | OQ151725   |          |
| <i>Chiropetalum schiedeanum</i> (Müll.Arg.) Pax                   | Silica          | rr624          | G.S. Hinton 22645 (NY)                 | México  | Puebla, Zaragoza                                     | OQ190629 | OQ18366 <sub>1</sub> | OQ151645 | OQ151727   |          |
| <i>Chiropetalum schiedeanum</i> (Müll.Arg.) Pax                   | Genbank         | GBCarranza3565 | Carranza 3565 (IEB)                    | México  |                                                      |          |                      |          | AY794744.1 |          |
| <i>Chiropetalum</i> sp.                                           | Herbarium       | rr625          | O. Fernandes 195 (JBN)                 | Chile   | Valparaiso, Viña del Mar, Cultivanda no              | OQ190632 |                      | OQ151646 | OQ151729   |          |

|                                                      |           |               |                                          |          |                                                                  |          |                      |           |            |          |
|------------------------------------------------------|-----------|---------------|------------------------------------------|----------|------------------------------------------------------------------|----------|----------------------|-----------|------------|----------|
|                                                      |           |               |                                          |          | Jardim Botânico Nacional                                         |          |                      |           |            |          |
| <i>Chiropetalum</i> sp.                              | Herbarium | PnovoayPR     | O. Fernandes 195 (1) (IEB)               | Chile    | Valparaíso, Viña del Mar, Cultivanda no Jardim Botânico Nacional | OQ190630 |                      |           | OQ151720   |          |
| <i>Chiropetalum</i> sp.                              | Genbank   | GBWeigend5670 | M. Weigend et al. 5670 (B)               | Peru     |                                                                  |          |                      | HG97200.4 | HG97183.7  |          |
| <i>Chiropetalum tricoccum</i> (Vell.) Chodat & Hassl | Herbarium | YPRNY         | Jardim et al. 1498 (NY)                  | Brasil   | Bahia                                                            | OQ190612 |                      |           | OQ151709   |          |
| <i>Chiropetalum tricoccum</i> (Vell.) Chodat & Hassl | Genbank   | GBDittrich193 | Dittrich 193 (NY)                        | Brasil   | Paraná                                                           |          |                      |           | AY794743.1 |          |
| <i>Chiropetalum tricoccum</i> (Vell.) Chodat & Hassl | Silica    | rr603         | L.P. Santos 322 (SP)                     | Brasil   | São Paulo                                                        | OQ190631 | OQ18366 <sub>2</sub> |           | OQ151728   | OQ116492 |
| <i>Chiropetalum tricoccum</i> (Vell.) Chodat & Hassl | Silica    | rr626         | J. Kulkamp et al. 615 (RB)               | Brasil   | Bahía, Jussari                                                   | OQ190633 | OQ18366 <sub>4</sub> |           | OQ151730   |          |
| <i>Chiropetalum tricuspidatum</i> (Lam.) A.Juss.     | Herbarium | y93           | E.J. Tepe & P.B. Pelser 2036 (RSA)       | Chile    | Bío-Bío, Concepción (Región VIII)                                | OQ190636 | OQ18366 <sub>5</sub> |           | OQ151731   | OQ116482 |
| <i>Chiropetalum tricuspidatum</i> (Lam.) A.Juss.     | Herbarium | rr627         | E.J. Tepe & P.B. Pelser 2036 (1) (RSA)   | Chile    | Bío-Bío, Concepción (Región VIII)                                |          | OQ18366 <sub>6</sub> |           |            |          |
| <i>Ditaxis acutangula</i>                            | Herbarium | YPR           | H. Mendoza et al. 9 (COL)                | Colombia | Tolima                                                           |          |                      |           | OQ151733   |          |
| <i>Ditaxis adenophora</i> (A.Gray) Pax & K.Hoffm.    | Herbarium | y132          | R. Guerrero & Van Devender 2010-37 (IEB) | México   | Sonora                                                           | OQ190639 | OQ18367 <sub>2</sub> |           |            |          |
| <i>Ditaxis adenophora</i> (A.Gray) Pax & K.Hoffm.    | Herbarium | rr630         | I.L. Wiggins & C.R. Rollins 183 (US)     | México   | Sonora, Guaymas, San Carlos                                      | OQ190638 | OQ18366 <sub>9</sub> |           | OQ151734   |          |

|                                                                                 |           |               |                                                |        |                                                 |            |                |  |            |  |
|---------------------------------------------------------------------------------|-----------|---------------|------------------------------------------------|--------|-------------------------------------------------|------------|----------------|--|------------|--|
|                                                                                 |           |               |                                                |        |                                                 |            |                |  |            |  |
| <i>Ditaxis adenophora</i><br>(A.Gray) Pax & K.Hoffm.                            | Herbarium | YPR           | P. Fryxell 3078<br>(MICH)                      | México | Sonora, 30<br>miles S of<br>Benjamín Hill       |            |                |  | OQ151735   |  |
| <i>Ditaxis aphoroides</i><br>(Müll.Arg.) Pax                                    | Herbarium | y94           | W.R. Carr 18104 (IEB)                          | USA    | Texas                                           | OQ190642   |                |  | OQ151738   |  |
| <i>Ditaxis argothamnoides</i><br>(Bertero ex Spreng.) Radcl.-<br>Sm. & Govaerts | Genbank   | GBWurdackD105 | K. Wurdack D105<br>(US)                        | USA    |                                                 | MK780949.1 | MK7810<br>80.1 |  | AY794741.1 |  |
| <i>Ditaxis argyraea</i> Cory                                                    | Herbarium | rr578         | H.B. Parks 24134 (F)                           | USA    | Texas                                           | OQ190568   | OQ18362<br>3   |  | OQ151651   |  |
| <i>Ditaxis argyraea</i> Cory                                                    | Herbarium | YPR           | H.B. Parks 24134 (1)<br>(F)                    | USA    | Texas                                           |            |                |  | OQ151739   |  |
| <i>Ditaxis blodgettii</i> (Torr. ex<br>Chapm.) Pax                              | Herbarium | rr635         | D.S. Correll & J.<br>Popenoe 48121 (NY)        | USA    | Florida,<br>Miami-Dade,<br>The<br>Hammocks      | OQ190644   | OQ18367<br>6   |  | OQ151741   |  |
| <i>Ditaxis blodgettii</i> (Torr. ex<br>Chapm.) Pax                              | Herbarium | YPR4          | D.S. Correll & J.<br>Popenoe 48121 (1)<br>(NY) | USA    | Florida,<br>Miami-Dade,<br>The<br>Hammocks      | OQ190643   |                |  | OQ151740   |  |
| <i>Ditaxis brandegeei</i> var.<br><i>brandegeei</i> (Millsp.) Rose &<br>Standl. | Herbarium | branYPR       | Y. Ramirez-Amezcu<br>et al. 1528 (IEB)         | México | Baja<br>California Sur.                         | OQ190645   |                |  | OQ151742   |  |
| <i>Ditaxis brandegeei</i> var.<br><i>brandegeei</i> (Millsp.) Rose &<br>Standl. | Herbarium | YPRMF31       | M. Fishbein et al. 3113<br>(IEB)               | Mexico | Baja<br>California Sur.<br>Sierra La<br>Giganta |            |                |  | OQ151743   |  |

|                                                          |           |         |                                            |           |                                                |          |              |          |          |          |
|----------------------------------------------------------|-----------|---------|--------------------------------------------|-----------|------------------------------------------------|----------|--------------|----------|----------|----------|
| <i>Ditaxis brandegeei</i> var. <i>intosa</i> I.M.Johnst. | Herbarium | rr636   | Y. Ramirez-Amezcu<br>et al. 1529 (IEB)     | México    | Baja<br>California,<br>Loreto                  | OQ190647 | OQ18367<br>7 |          | OQ151744 | OQ116494 |
| <i>Ditaxis brandegeei</i> var. <i>intosa</i> I.M.Johnst. | Herbarium | YPRTR   | Y. Ramirez-Amezcu<br>et al. 1529 (1) (IEB) | México    | Baja<br>California,<br>Loreto                  | OQ190646 |              |          | OQ151745 |          |
| <i>Ditaxis breviramea</i><br>(Müll.Arg.) Pax & K.Hoffm.  | Silica    | rr637   | J. Külkamp 563 (RB)                        | Argentina | Jujuy                                          | OQ190648 | OQ18367<br>8 | OQ151647 | OQ151747 | OQ116495 |
| <i>Ditaxis breviramea</i><br>(Müll.Arg.) Pax & K.Hoffm.  | Herbarium | YPR48   | M. Nee & E. Chávez<br>48919 (NY)           | Bolivia   | Depto Santa<br>Cruz. Prov.<br>Florida          | OQ190650 |              |          | OQ151746 |          |
| <i>Ditaxis breviramea</i><br>(Müll.Arg.) Pax & K.Hoffm.  | Herbarium | YPR92   | M. Nee & E. Chávez<br>48919 (1) (NY)       | Bolivia   | Depto Santa<br>Cruz. Prov.<br>Florida          | OQ190649 |              |          |          |          |
| <i>Ditaxis claryana</i> (Jeps.)<br>G.L.Webster           | Herbarium | YPR3384 | S.J. de Groot & N.<br>Fraga 3384 (RSA)     | USA       | San<br>Bernardino<br>Co., Whipple<br>Mountains | OQ190653 |              |          |          |          |
| <i>Ditaxis claryana</i> (Jeps.)<br>G.L.Webster           | Herbarium | YPR     | S.J. de Groot & N.<br>Fraga 3384 (1) (RSA) | USA       | San<br>Bernardino<br>Co., Whipple<br>Mountains | OQ190655 |              |          | OQ151749 |          |
| <i>Ditaxis claryana</i> (Jeps.)<br>G.L.Webster           | Herbarium | YPR94   | S.J. De Groot & N.<br>Fraga 94 (F)         | USA       | San<br>Bernardino                              | OQ190654 |              |          |          |          |
| <i>Ditaxis cyanophylla</i> Wooton<br>& Standl.           | Herbarium | rr638   | D. Thornburg 597<br>(NY)                   | USA       | Arinona                                        | OQ190656 | OQ18368<br>0 |          | OQ151750 | OQ116498 |
| <i>Ditaxis cyanophylla</i> Wooton<br>& Standl.           | Herbarium | YPR9165 | M.A. Becker 9165<br>(RSA)                  | USA       | Arinona                                        | OQ190657 |              |          |          |          |
| <i>Ditaxis desertorum</i><br>(Müll.Arg.) Pax & K.Hoffm.  | Silica    | rr639   | J. Külkamp et al. 631<br>(RB)              | Brasil    | Bahía, Iaçú                                    | OQ190658 | OQ18368<br>1 |          | OQ151751 | OQ116496 |
| <i>Ditaxis desertorum</i><br>(Müll.Arg.) Pax & K.Hoffm.  | Silica    | rr640   | J. Külkamp et al. 703<br>(RB)              | Brasil    | Bahía, Ipirá                                   | OQ190659 | OQ18368<br>2 |          | OQ151752 | OQ116497 |

|                                                         |           |                |                                                        |        |                                                |            |              |           |           |          |
|---------------------------------------------------------|-----------|----------------|--------------------------------------------------------|--------|------------------------------------------------|------------|--------------|-----------|-----------|----------|
| <i>Ditaxis dioica</i> Kunth                             | Silica    | rr641          | L.R. Quiroz 1760 (NY)                                  | Perú   | Cajamarca, Jaén                                | OQ190662   | OQ18367<br>1 |           |           |          |
| <i>Ditaxis dioica</i> Kunth                             | Herbarium | y92            | H. Van der Werff, R. Vasquez & B. Gray 16411 (MOL)     | Perú   | Cajamarca, Jaén                                | OQ190709   | OQ18363<br>2 |           |           |          |
| <i>Ditaxis dioica</i> Kunth                             | Herbarium | rr669          | H. Van der Werff, R. Vasquez & B. Gray 16411 (MOL)     | Perú   | Cajamarca, Jaén                                | OQ190708   |              |           | OQ151800  |          |
| <i>Ditaxis dioica</i> Kunth                             | Herbarium | MOLYPR         | H. Van der Werff, R. Vasquez & B. Gray 16411 (1) (MOL) | Perú   | Cajamarca, Jaén; 05.42S, 078.48W. 25 Mar. 2001 |            |              |           | OQ151801  |          |
| <i>Ditaxis fasciculata</i> (Vahl ex A. Juss.) Müll.Arg. | Herbarium | rr642          | P. Acevedo-Rodriguez & A. Siaca 3866 (US)              | USA    | Virgin Islands, St. John, Coral Bay            | OQ190663   | OQ1836<br>83 |           | OQ151753  |          |
| <i>Ditaxis fasciculata</i> (Vahl ex A. Juss.) Müll.Arg. | Herbarium | y81            | P. Acevedo-Rodriguez & A. Siaca 3866 (1) (US)          | USA    | Virgin Islands, St. John, Coral Bay            | OQ190665   | OQ18368<br>5 |           | OQ151755  |          |
| <i>Ditaxis fasciculata</i> (Vahl ex A. Juss.) Müll.Arg. | Silica    | rr643          | P. Acevedo-Rodriguez et al. 2562 (NY)                  | USA    | Virgin Islands, Central, Saint John            | OQ190664   | OQ18368<br>4 |           | OQ151754  | OQ116502 |
| <i>Ditaxis grazielae</i> Külkamp                        | Silica    | rr644          | J. Külkamp et al. 689 (RB)                             | Brasil | Bahía, Jussara                                 | OQ190666   | OQ18368<br>6 |           | OQ151756  |          |
| <i>Ditaxis grazielae</i> Külkamp                        | Silica    | rr645          | J. Külkamp et al. 688 (RB)                             | Brasil | Bahía, Jussara                                 | OQ190667   | OQ18368<br>7 |           | OQ151757  | OQ116505 |
| <i>Ditaxis guatemalensis</i> (Müll.Arg.) Pax & K.Hoffm. | Silica    | rr646          | Y. Ramirez-Amezcu 1094 (NY)                            | México | Querétaro, El Marqués                          | OQ190668   | OQ18368<br>8 |           | OQ151758  | OQ116507 |
| <i>Ditaxis guatemalensis</i> (Müll.Arg.) Pax & K.Hoffm. | Genbank   | GBGonzalez6363 | S. González & R. R. Clinebell 6363 (MEXU)              | Mexico |                                                |            |              | HG97203.0 | HG97186.3 |          |
| <i>Ditaxis guatemalensis</i> (Müll.Arg.) Pax & K.Hoffm. | Silica    | YPRVWS7        | V.W. Steinmann 723 (IEB)                               | Mexico |                                                | DQ997792.1 |              |           | OQ151759  |          |

|                                                          |           |               |                                                         |           |                                          |            |          |            |            |          |
|----------------------------------------------------------|-----------|---------------|---------------------------------------------------------|-----------|------------------------------------------|------------|----------|------------|------------|----------|
| <i>Ditaxis guatemalensis</i> (Müll.Arg.) Pax & K.Hoffm.  | Herbarium | YPR           | V.W. Steinmann & Y. Ramírez-Amezcu, 5538 (IEB)          | Mexico    | Michoacán. Municipio de Múgica           | OQ190669   |          |            | OQ151760   |          |
| <i>Ditaxis guatemalensis</i> (Müll.Arg.) Pax & K.Hoffm.  | Genbank   | GBVentura7224 | E. Ventura & E. Lopez 7224 (MEXU)                       | Mexico    |                                          |            |          | HG972031.1 | HG971864.1 |          |
| <i>Ditaxis heterantha</i> Zucc.                          | Silica    | rr647         | Y. Ramírez-Amezcu 638 (NY)                              | México    | Michoacán, Jiquilpan                     | OQ190670   | OQ183689 |            | OQ151762   | OQ116508 |
| <i>Ditaxis heterantha</i> Zucc.                          | Silica    | YPRTR         | Y. Ramírez-Amezcu 638 (1) (NY)                          | México    | Michoacán, Jiquilpan                     | OQ190671   |          |            | OQ151761   |          |
| <i>Ditaxis humilis</i> (Engelm. & A.Gray) Pax            | Herbarium | rr648         | M. Nee 57-75 (NY)                                       | USA       | Texas                                    | OQ190672   | OQ183690 |            | OQ151763   | OQ116509 |
| <i>Ditaxis humilis</i> (Engelm. & A.Gray) Pax            | Herbarium | YPR           | T.R. Van Devender 96-295 (RSA)                          | USA       | Texas                                    | OQ190673   |          |            |            |          |
| <i>Ditaxis jablonszkyana</i> (Pax & K.Hoffm.) J.W.Ingram | Silica    | rr650         | J. Külkamp 1247 (BA)                                    | Argentina | San Juan, Marayes                        | OQ190674   | OQ183691 |            | OQ151764   | OQ116512 |
| <i>Ditaxis jablonszkyana</i> (Pax & K.Hoffm.) J.W.Ingram | Herbarium | YPR           | A.T. Hunziker 22428 (F)                                 | Argentina | General Lavalle                          |            |          |            | OQ151765   |          |
| <i>Ditaxis lanceolata</i> (Benth.) Pax & K.Hoffm.        | Silica    | rr651         | T. Nash et al. 9950 (NY)                                | USA       | Arizona                                  | OQ190676   | OQ183692 |            | OQ151766   | OQ116514 |
| <i>Ditaxis lanceolata</i> (Benth.) Pax & K.Hoffm.        | Genbank   | GBBoyd10488   | Boyd 10488 (CA)                                         | USA       |                                          | MF979102.1 |          |            |            |          |
| <i>Ditaxis lanceolata</i> (Benth.) Pax & K.Hoffm.        | Genbank   | GBSanders3529 | A. C. Sanders et al. 3529 (MEXU)                        | Mexico    |                                          |            |          | HG97203.2  | HG97186.5  |          |
| <i>Ditaxis lanceolata</i> (Benth.) Pax & K.Hoffm.        | Herbarium | YPR0          | Y. Ramírez-Amezcu, V.W. Steinmann & Y. Yang, 1506 (IEB) | Mexico    | Baja California Sur. Municipio de La Paz | OQ190675   |          |            |            |          |
| <i>Ditaxis malpighiacea</i> (Ule) Pax & Hoffm.           | Silica    | rr652         | J. Külkamp et al. 659 (RB)                              | Brasil    | Bahía, Mucugê                            | OQ190677   | OQ183693 |            | OQ151767   | OQ116515 |
| <i>Ditaxis malpighiacea</i> (Ule) Pax & Hoffm.           | Silica    | rr653         | J. Külkamp et al. 692 (RB)                              | Brasil    | Bahía, Morro do Chapéu                   | OQ190678   | OQ183694 |            | OQ151768   |          |

|                                                                               |           |              |                                                      |           |                                                                     |          |              |           |           |          |
|-------------------------------------------------------------------------------|-----------|--------------|------------------------------------------------------|-----------|---------------------------------------------------------------------|----------|--------------|-----------|-----------|----------|
| <i>Ditaxis malpighiphila</i><br>(Hicken) L.C.Wheeler                          | Silica    | rr654        | J. Külkamp 1245 (BA)                                 | Argentina | Mendoza,<br>Luján de<br>Cuyo,<br>Potrerillos                        | OQ190679 | OQ18369<br>5 |           | OQ151769  | OQ116513 |
| <i>Ditaxis manzanilloana</i><br>(Rose) Pax & K.Hoffm.                         | Herbarium | y133         | R. Guerrero & Van<br>Devender 2009-1003<br>(IEB)     | México    | Sonora                                                              | OQ190681 | OQ18369<br>6 |           |           | OQ116501 |
| <i>Ditaxis manzanilloana</i><br>(Rose) Pax & K.Hoffm.                         | Genbank   | GBSaynes5417 | A. Saynes et al. (5417<br>MEXU)                      | Mexico    |                                                                     |          |              | HG97203.3 | HG97186.6 |          |
| <i>Ditaxis manzanilloana</i><br>(Rose) Pax & K.Hoffm.                         | Herbarium | SonoraYPR    | R. Guerrero & Van<br>Devender 2009-1003<br>(1) (IEB) | México    | Sonora                                                              | OQ190680 |              |           |           |          |
| <i>Ditaxis mercurialina</i> (Nutt.)<br>J.M.Coult.                             | Herbarium | YPRTR        | C.A. Morse 6830 (NY)                                 | USA       | Kansas, Chase                                                       | OQ190684 |              |           | OQ151772  |          |
| <i>Ditaxis mercurialina</i> (Nutt.)<br>J.M.Coult.                             | Herbarium | rr655        | C.A. Morse 6830 (1)<br>(NY)                          | USA       | Kansas, Chase<br>Co: N side of<br>Chase Co<br>State Fishing<br>Lake | OQ190682 |              |           | OQ151770  | OQ116499 |
| <i>Ditaxis mercurialina</i> var.<br><i>pilosissima</i> (Bentham) A.<br>Heller | Herbarium | rr656        | W.R. Carr 32893 (NY)                                 | USA       | Texas                                                               | OQ190683 | OQ18369<br>7 |           | OQ151771  | OQ116500 |
| <i>Ditaxis montevidensis</i><br>(Didr.) Pax                                   | Herbarium | y98          | T. Meyer 2225 (F)                                    | Argentina | Fontana                                                             | OQ190651 | OQ18367<br>9 |           | OQ151748  |          |
| <i>Ditaxis montevidensis</i><br>(Didr.) Pax                                   | Herbarium | YPR          | T. Meyer 2225 (1) (F)                                | Argentina | Fontana                                                             | OQ190652 |              |           |           |          |
| <i>Ditaxis montevidensis</i><br>(Didr.) Pax                                   | Silica    | rr657        | J. Külkamp et al. 367<br>(ICN)                       | Brasil    | Río Grande do<br>Sul, Barra do<br>Quaraí                            | OQ190685 | OQ18369<br>8 |           | OQ151774  |          |
| <i>Ditaxis montevidensis</i><br>(Didr.) Pax                                   | Silica    | rr658        | J. Külkamp 1250 (BA)                                 | Argentina | Córdoba,<br>Córdoba<br>capital                                      | OQ190686 | OQ18369<br>9 |           | OQ151775  | OQ116511 |

|                                                         |           |               |                                                                     |                             |                                            |          |              |           |           |          |
|---------------------------------------------------------|-----------|---------------|---------------------------------------------------------------------|-----------------------------|--------------------------------------------|----------|--------------|-----------|-----------|----------|
| <i>Ditaxis montevidensis</i><br>(Didr.) Pax             | Herbarium | rr677         | R. Riina 1892 (MA)                                                  | Argentina                   | Salta                                      | OQ190687 | OQ18370<br>0 |           | OQ151776  | OQ116510 |
| <i>Ditaxis montevidensis</i><br>(Didr.) Pax             | Herbarium | rr667         | A. Pott 8878 (CPAP)                                                 | Brasil                      | Mato Grosso<br>do Sul, Porto<br>Murtinho   | OQ190706 |              |           | OQ151798  |          |
| <i>Ditaxis montevidensis</i><br>(Didr.) Pax             | Herbarium | YPR1          | Wood & Carretero<br>19309 (LPB)                                     | Bolivia                     | Dpto.<br>Chuquisaca.<br>Prov. Oropeza      |          |              |           | OQ151777  |          |
| <i>Ditaxis polygama</i> (Jacq.)<br>L.C.Wheeler          | Herbarium | rr659         | R.A. Howard 18661<br>(NY)                                           | Francia<br>(West<br>Indies) | Martinique,<br>Sainte-Anne,<br>Creve-Coeur | OQ190689 |              |           | OQ151779  |          |
| <i>Ditaxis polygama</i> (Jacq.)<br>L.C.Wheeler          | Herbarium | YPR           | R.A. Howard 18661<br>(1) (NY)                                       | Francia<br>(West<br>Indies) | Martinique,<br>Sainte-Anne,<br>Creve-Coeur |          | OQ18370<br>1 |           | OQ151780  |          |
| <i>Ditaxis pringlei</i> (Greenm.)<br>Pax & K.Hoffm.     | Silica    | rr660         | Y. Ramirez-Amezcu<br>a 513 (NY)                                     | Mexico                      | Michoacán,<br>Uruapan                      | OQ190690 | OQ18370<br>2 |           | OQ151781  | OQ116516 |
| <i>Ditaxis pringlei</i> (Greenm.)<br>Pax & K.Hoffm.     | Silica    | YPR           | R. Ramírez-Amezcu<br>a, A.G. Rocha-Loredo &<br>A. Machuca 656 (IEB) | Mexico                      | Jalisco. Mpio.<br>Tuxcueca                 | OQ190691 |              |           | OQ151782  |          |
| <i>Ditaxis pringlei</i> (Greenm.)<br>Pax & K.Hoffm.     | Genbank   | GBRiviera3326 | J. Rivera & Espinosa<br>3326 (MEXU)                                 | Mexico                      |                                            |          |              | HG97203.5 | HG97186.8 |          |
| <i>Ditaxis purpurascens</i><br>(S.Moore) Pax & K.Hoffm. | Silica    | rr661         | J. Kùlkamp 513 (RB)                                                 | Brasil                      | Mato Grosso<br>do Sul,<br>Corumbá          | OQ190692 | OQ18370<br>3 |           | OQ151783  | OQ116517 |
| <i>Ditaxis purpurascens</i><br>(S.Moore) Pax & K.Hoffm. | Herbarium | rr678         | S. Beck 27535 (MA)                                                  | Bolivia                     | Santa Cruz                                 | OQ190693 | OQ18370<br>4 |           | OQ151784  |          |
| <i>Ditaxis rubricaulis</i> Pax &<br>K.Hoffm.            | Herbarium | y91           | Croizat s.n. (NY)                                                   | Venezuel<br>a               | Sucre                                      | OQ190694 |              |           | OQ151786  |          |
| <i>Ditaxis salina</i> Pax &<br>K.Hoffm.                 | Silica    | rr662         | A. Pott et al. 10785<br>(CPAP)                                      | Brasil                      | Mato Grosso<br>do Sul, Bela<br>Vista       | OQ190695 | OQ18370<br>5 |           | OQ151787  |          |



|                                                                                |                 |       |                                       |           |                                          |          |              |  |                      |          |
|--------------------------------------------------------------------------------|-----------------|-------|---------------------------------------|-----------|------------------------------------------|----------|--------------|--|----------------------|----------|
| <i>Ditaxis sellowiana</i> Pax & K.Hoffm.                                       | Herbarium       | YPR1  | Jorgensen 4352 (F)                    | Paraguay  | Villarrica                               |          |              |  | OQ151785             |          |
| <i>Ditaxis sellowiana</i> Pax & K.Hoffm.                                       | Silica          | rr663 | J. Külkamp et al. 418 (ICN)           | Brasil    | Río Grande do Sul, Santiago              | OQ190696 | OQ18370<br>6 |  | OQ151789             |          |
| <i>Ditaxis sellowiana</i> Pax & K.Hoffm.                                       | Silica          | rr664 | J. Külkamp et al. 394 (ICN)           | Brasil    | Río Grande do Sul, Alegrete              | OQ190694 | OQ18370<br>7 |  | OQ151790             | OQ116518 |
| <i>Ditaxis sellowiana</i> Pax & K.Hoffm.                                       | Külkamp-Masters | K9    | J. Külkamp et al. 159 (ICN)           | Brasil    | Rio Grande do Sul, Caçapava do Sul       |          |              |  | OQ151788             |          |
| <i>Ditaxis sellowiana</i> Pax & K.Hoffm.                                       | Herbarium       | y84   | L.T.M. Pedersen 3807 (NY)             | Argentina |                                          | OQ190637 | OQ18366<br>8 |  |                      |          |
| <i>Ditaxis sellowiana</i> Pax & K.Hoffm.                                       | Herbarium       | YPR   | L.T.M. Pedersen 3807 (1) (NY)         | Argentina |                                          |          |              |  | OQ151732             |          |
| <i>Ditaxis sellowiana</i> Pax & K.Hoffm.                                       | Herbarium       | y87   | Jorgensen 351 (F)                     | Argentina |                                          | OQ190698 |              |  | OQ151791             |          |
| <i>Ditaxis serrata</i> Torr.                                                   | Herbarium       | YPR1  | T. Van Devender & Reina 2007-09 (IEB) | Mexico    | Sonora. Arroyo El Mentidero              | OQ190688 |              |  | OQ151778             |          |
| <i>Ditaxis serrata</i> Torr.                                                   | Silica          | rr665 | V.W. Steinmann 1709 (NY)              | Mexico    | Michoacán, Uruapan                       | OQ190699 | OQ18370<br>8 |  | OQ151792             | OQ116519 |
| <i>Ditaxis serrata</i> Torr.                                                   | Herbarium       | y101  | Y. Ramírez-Amezcu et al. 1068 (IEB)   | Mexico    | Michoacán                                |          |              |  | OQ151773<br>OQ151793 | OQ116520 |
| <i>Ditaxis silviae</i> = <i>Argythamnia silviae</i> Ram.-Amezcu & V.W. Steinm. | Herbarium       | rr668 | S. Salas et al. 3496 (MEXU)           | Mexico    | Oaxaca, Tehuantepec, San Pedro Huamelula | OQ190707 | OQ18371<br>0 |  | OQ151799             |          |
| <i>Ditaxis silviae</i> = <i>Argythamnia silvia</i> Ram.-Amezcu & V.W. Steinm.  | Herbarium       | YPR   | S. Salas et al. 3496 (1) (MEXU)       | Mexico    | Oaxaca, Tehuantepec, San Pedro Huamelula | OQ190702 |              |  |                      |          |

|                                                                                      |           |           |                                                         |        |                                                    |            |              |                |            |          |
|--------------------------------------------------------------------------------------|-----------|-----------|---------------------------------------------------------|--------|----------------------------------------------------|------------|--------------|----------------|------------|----------|
| <i>Ditaxis silviae</i> =<br><i>Argythamnia silvia</i> Ram.-<br>Amezcu & V.W. Steinm. | Herbarium | y97       | S. Salas et al. 3496 (2)<br>(MEXU)                      | Mexico | Oaxaca,<br>Tehuantepec,<br>San Pedro<br>Huamelula, | OQ190701   |              |                | OQ151802   |          |
| <i>Ditaxis simoniana</i> Casar.                                                      | Silica    | rr666     | J. Külkamp 482 (RB)                                     | Brasil | Rio de Janeiro,<br>Niterói                         | OQ190704   | OQ18370<br>9 |                | OQ151795   |          |
| <i>Ditaxis simulans</i><br>(J.W.Ingram) Radcl.-Sm. &<br>Govaerts                     | Herbarium | YPR       | D.H. Riskind 2370<br>(MEXU)                             | Mexico | Coahuila.<br>Mpio. Villa<br>Acuña                  | OQ190705   |              |                | OQ151797   |          |
| <i>Ditaxis</i> sp.                                                                   | Silica    | rr633     | J. Carrion 2005<br>(HUEFS)                              | Brasil | Minas Gerais,<br>Januária                          | OQ190640   | OQ18367<br>4 |                | OQ151736   | OQ116504 |
| <i>Ditaxis</i> sp.                                                                   | Silica    | rr634     | J. Külkamp et al. 914<br>(RB)                           | Brasil | Minas Gerais,<br>Santo Hipólito                    | OQ190641   | OQ18367<br>5 |                | OQ151737   | OQ116503 |
| <i>Ditaxis</i> sp.                                                                   | Herbarium | rr632     | W.W. Thomas, J.<br>Jardim & F. Juchum<br>12361 (NY)     | Brasil | Bahía, Itaju do<br>Colônia                         | OQ190703   | OQ18367<br>3 |                | OQ151794   | OQ116506 |
| <i>Ditaxis</i> sp.                                                                   | Herbarium | y95       | W.W. Thomas, J.<br>Jardim & F. Juchum<br>12361 (1) (NY) | Brasil | Bahía, Itaju do<br>Colônia                         | OQ190660   |              |                |            |          |
| <i>Ditaxis</i> sp.                                                                   | Herbarium | YPRItaju  | W.W. Thomas, J.<br>Jardim & F. Juchum<br>12361 (2) (NY) | Brasil | Bahía, Itaju do<br>Colônia                         | OQ190661   |              |                | OQ151796   |          |
| <i>Enriquebeltrania</i><br><i>crenatifolia</i> (Miranda) Rzed.                       | Genbank   | Denova114 | De-Nova 114 (XAL)                                       | Mexico |                                                    | DQ997793.1 |              |                |            |          |
| <i>Enriquebeltrania disjuncta</i><br>De-Nova & Sosa                                  | Genbank   | DeNova109 | A. De Nova 109<br>(XAL)                                 | Mexico |                                                    | DQ997794.1 |              |                |            |          |
| <i>Enriquebeltrania disjuncta</i><br>De-Nova & Sosa                                  | Genbank   | DeNova107 | A. De Nova 107<br>(MEXU)                                | Mexico |                                                    |            |              | HG972036.<br>1 | HG971869.1 |          |
| <i>Philyra brasiliensis</i><br>Klotzsch                                              | Silica    | rr671     | J. Külkamp et al. 1046<br>(RB)                          | Brasil | Espírito Santo,<br>Colatina                        | OQ190710   | OQ18371<br>1 |                | OQ151803   |          |
| <i>Philyra brasiliensis</i><br>Klotzsch                                              | Silica    | rr672     | J. Külkamp et al. 1213<br>(RB)                          | Brasil | Rio de Janeiro,<br>Italva                          | OQ190711   | OQ18371<br>2 |                | OQ151804   | OQ116533 |

|                                            |         |                |                                        |                        |  |            |                |           |            |  |
|--------------------------------------------|---------|----------------|----------------------------------------|------------------------|--|------------|----------------|-----------|------------|--|
| <i>Philyra brasiliensis</i><br>Klotzsch    | Genbank | GBZardini      | E. Zardini s.n. (K)                    | Paraguay               |  |            |                | HG97208.1 | HG97191.4  |  |
| <i>Philyra brasiliensis</i><br>Klotzsch    | Genbank | YPR            | G. Webster 25536<br>(NY)               | Brazil                 |  | MK780962.1 | MK7811<br>11.1 |           | AY794740.1 |  |
| <i>Philyra brasiliensis</i><br>Klotzsch    | Genbank | GBThomas12565  | W.W. Thomas et al.<br>12565 (NY)       | Brazil                 |  | GU000028.1 |                |           |            |  |
| <i>Plukenetia penninervia</i><br>Müll.Arg. | Genbank | Frisch5996     | Wallnoefer & Frisch<br>5996 (MO)       | Guatemala              |  | MF502551.1 | MF50247<br>7.1 |           |            |  |
| <i>Plukenetia penninervia</i><br>Müll.Arg. | Genbank | Calónico22458  | J. Calónico 22458<br>(MEXU)            | Mexico                 |  |            |                |           | HG971924.1 |  |
| <i>Plukenetia volubilis</i> L.             | Genbank | Huamantupa3500 | Huamantupa 3500<br>(CAN)               | Peru                   |  | MF502500.1 | MF50256<br>8.1 |           |            |  |
| <i>Plukenetia volubilis</i> L.             | Genbank | Armbruster38   | Armbruster 38 (no<br>collection cited) | No<br>country<br>cited |  |            |                |           | AY794756.1 |  |
| <i>Seidelia triandra</i> (E. Mey.)<br>Pax  | Genbank | Giess13381     | Giess 13381 (MO)                       | No<br>country<br>cited |  |            |                |           | AY794762.1 |  |
