# Supplementary material for: Systematics of Ditaxinae and Related Lineages within the Subfamily Acalyphoideae (Euphorbiaceae) Based on Molecular Phylogenetics
Source: MDPI journal article supplement (doi:10.3390/biology12020173), 2023-01-21
Supplement: s1 [file s1]

# SUPPLEMENTARY MATERIAL S3

## Systematics of Ditaxinae and related lineages within subfamily Acalyphoideae (Euphorbiaceae) based on molecular phylogenetics

Josimar Külkamp, Ricarda Riina, Yocupitzia Ramírez-Amezcu, João R.V. Iganci, Inês Cordeiro, Raquel González-Páramo, Sabina Irene Lara-Cabrera and José Fernando A. Baumgratz

### Supplementary material S3

**Table S1:** Summary of the new classification of Ditaxinae and related groups within Acalyphoideae (Euphorbiaceae) and the previous classification. The new classification does not include the subtribe level as in the case of Webster's (2014) scheme.

| New classification (Külkamp et al.)                                            |          | Previous classification (Webster 2014)                                         |           |               |
|--------------------------------------------------------------------------------|----------|--------------------------------------------------------------------------------|-----------|---------------|
| Species                                                                        | Tribe    | Species                                                                        | Subtribe  | Tribe         |
| <i>Adelia barbinervis</i> Cham. & Schltdl.                                     | Adelieae | <i>Adelia barbinervis</i> Cham. & Schltdl.                                     | -         | Adelieae      |
| <i>Adelia brandegeei</i> V.W. Steinm.                                          | Adelieae | <i>Adelia brandegeei</i> V.W. Steinm.                                          | -         | Adelieae      |
| <i>Adelia cinerea</i> (Wiggins & Rollins) A.Cerv., V.W.Steinm. & Flores-Olvera | Adelieae | <i>Adelia cinerea</i> (Wiggins & Rollins) A.Cerv., V.W.Steinm. & Flores-Olvera | -         | Adelieae      |
| <i>Adelia membranifolia</i> (Müll.Arg.) Chodat & Hassl.                        | Adelieae | <i>Adelia membranifolia</i> (Müll.Arg.) Chodat & Hassl.                        | -         | Adelieae      |
| <i>Adelia oaxacana</i> (Müll.Arg.) Hemsl.                                      | Adelieae | <i>Adelia oaxacana</i> (Müll.Arg.) Hemsl.                                      | -         | Adelieae      |
| <i>Adelia obovata</i> Wiggins & Rollins                                        | Adelieae | <i>Adelia obovata</i> Wiggins & Rollins                                        | -         | Adelieae      |
| <i>Adelia ricinella</i> L.                                                     | Adelieae | <i>Adelia ricinella</i> L.                                                     | -         | Adelieae      |
| <i>Adelia triloba</i> (Müll.Arg.) Hemsl.                                       | Adelieae | <i>Adelia triloba</i> (Müll.Arg.) Hemsl.                                       | -         | Adelieae      |
| <i>Adelia vaseyi</i> (J.M.Coult.) Pax & K.Hoffm.                               | Adelieae | <i>Adelia vaseyi</i> (J.M.Coult.) Pax & K.Hoffm.                               | -         | Adelieae      |
| <i>Argythamnia argyraea</i> Cory                                               | Ditaxeae | <i>Argythamnia argyraea</i> Cory                                               | Ditaxinae | Chrozophoreae |
| <i>Argythamnia arlynniana</i> J.W.Ingram                                       | Ditaxeae | <i>Ditaxis arlynniana</i> (J.W.Ingram) Radcl.-Sm. & Govaerts                   | Ditaxinae | Chrozophoreae |
| <i>Argythamnia brandegeei</i> Millsp.                                          | Ditaxeae | <i>Ditaxis brandegeei</i> (Millsp.) Rose & Standl.                             | Ditaxinae | Chrozophoreae |
| <i>Argythamnia breviramea</i> Müll.Arg                                         | Ditaxeae | <i>Ditaxis breviramea</i> (Müll.Arg.) Pax & K.Hoffm.                           | Ditaxinae | Chrozophoreae |
| <i>Argythamnia calycina</i> Müll.Arg.                                          | Ditaxeae | <i>Ditaxis calycina</i> (Müll.Arg.) Pax & K.Hoffm.                             | Ditaxinae | Chrozophoreae |
| <i>Argythamnia candicans</i> Swartz                                            | Ditaxeae | <i>Argythamnia candicans</i> Swartz                                            | Ditaxinae | Chrozophoreae |
| <i>Argythamnia claryana</i> Jeps.                                              | Ditaxeae | <i>Ditaxis claryana</i> (Jeps.) G.L.Webster                                    | Ditaxinae | Chrozophoreae |
| <i>Argythamnia coatepensis</i> (T.S.Brandege) Croizat                          | Ditaxeae | <i>Argythamnia coatepensis</i> (T.S.Brandege) Croizat                          | Ditaxinae | Chrozophoreae |
| <i>Argythamnia cubensis</i> Britton & Wilson                                   | Ditaxeae | <i>Argythamnia cubensis</i> Britton & Wilson                                   | Ditaxinae | Chrozophoreae |
| <i>Argythamnia cuneifolia</i> (Pax & K.Hoffm.) J.W.Ingram                      | Ditaxeae | <i>Ditaxis cuneifolia</i> Pax & K.Hoffm.                                       | Ditaxinae | Chrozophoreae |
| <i>Argythamnia cyanophylla</i> (Wooton & Standl.)                              | Ditaxeae | <i>Ditaxis cyanophylla</i> Wooton & Standl.                                    | Ditaxinae | Chrozophoreae |

|                                                                  |          |                                                            |           |               |
|------------------------------------------------------------------|----------|------------------------------------------------------------|-----------|---------------|
| J.W.Ingram                                                       |          |                                                            |           |               |
| <i>Argythamnia depressa</i> (Greenm.) J.W.Ingram                 | Ditaxeae | <i>Ditaxis depressa</i> (Greenm.) Pax & K.Hoffm.           | Ditaxinae | Chrozophoreae |
| <i>Argythamnia desertorum</i> Müll.Arg.                          | Ditaxeae | <i>Ditaxis desertorum</i> (Müll.Arg.) Pax & K.Hoffm.       | Ditaxinae | Chrozophoreae |
| <i>Argythamnia dioica</i> (Bonpland, Humboldt & Kunth) Müll.Arg. | Ditaxeae | <i>Ditaxis dioica</i> Bonpland, Humboldt & Kunth           | Ditaxinae | Chrozophoreae |
| <i>Argythamnia ecdyomena</i> J.Ingram                            | Ditaxeae | <i>Argythamnia ecdyomena</i> J.Ingram                      | Ditaxinae | Chrozophoreae |
| <i>Argythamnia erubescens</i> J.R.Johnst.                        | Ditaxeae | <i>Ditaxis erubescens</i> (J.R.Johnst.) Pax & K.Hoffm.     | Ditaxinae | Chrozophoreae |
| <i>Argythamnia fasciculata</i> (Vahl ex A.Juss.) Müll.Arg.       | Ditaxeae | <i>Ditaxis fasciculata</i> Vahl ex A.Juss.                 | Ditaxinae | Chrozophoreae |
| <i>Argythamnia fendleri</i> Müll.Arg                             | Ditaxeae | <i>Ditaxis fendleri</i> (Müll.Arg.) Pax & K.Hoffm.         | Ditaxinae | Chrozophoreae |
| <i>Argythamnia grazielae</i> (Külkamp) Külkamp & Riina           | Ditaxeae | <i>Ditaxis grazielae</i> Külkamp                           | Ditaxinae | Chrozophoreae |
| <i>Argythamnia guatemalensis</i> Müll.Arg.                       | Ditaxeae | <i>Ditaxis guatemalensis</i> (Müll.Arg.) Pax & K.Hoffm.    | Ditaxinae | Chrozophoreae |
| <i>Argythamnia haitiensis</i> (Urb.) J.W.Ingram                  | Ditaxeae | <i>Argythamnia haitiensis</i> (Urb.) J.W.Ingram            | Ditaxinae | Chrozophoreae |
| <i>Argythamnia haplostigma</i> Pax & K.Hoffm.                    | Ditaxeae | <i>Argythamnia haplostigma</i> Pax & K.Hoffm.              | Ditaxinae | Chrozophoreae |
| <i>Argythamnia heterantha</i> (Zucc.) Müll.Arg.                  | Ditaxeae | <i>Ditaxis heterantha</i> Zucc.                            | Ditaxinae | Chrozophoreae |
| <i>Argythamnia heteropilosa</i> J.Ingram                         | Ditaxeae | <i>Argythamnia heteropilosa</i> J.Ingram                   | Ditaxinae | Chrozophoreae |
| <i>Argythamnia humilis</i> (Engelm. & A.Gray) Müll.Arg.          | Ditaxeae | <i>Ditaxis humilis</i> (Engelm. & A.Gray) Pax              | Ditaxinae | Chrozophoreae |
| <i>Argythamnia illimaniensis</i> (Baill.) Müll.Arg.              | Ditaxeae | <i>Ditaxis illimaniensis</i> Baill.                        | Ditaxinae | Chrozophoreae |
| <i>Argythamnia ingramii</i> Y.Ramírez-Amezcu & V.W.Steinm.       | Ditaxeae | <i>Argythamnia ingramii</i> Y.Ramírez-Amezcu & V.W.Steinm. | Ditaxinae | Chrozophoreae |
| <i>Argythamnia jablonszkyana</i> (Pax & K.Hoffm.) J.W.Ingram     | Ditaxeae | <i>Ditaxis jablonszkyana</i> Pax & K.Hoffm.                | Ditaxinae | Chrozophoreae |
| <i>Argythamnia katharinae</i> (Pax) Croizat                      | Ditaxeae | <i>Ditaxis katharinae</i> Pax                              | Ditaxinae | Chrozophoreae |
| <i>Argythamnia lanceolata</i> (Benth.) Müll.Arg.                 | Ditaxeae | <i>Ditaxis lanceolata</i> Benth.                           | Ditaxinae | Chrozophoreae |
| <i>Argythamnia lottiae</i> J.Ingram                              | Ditaxeae | <i>Argythamnia lottiae</i> J.Ingram                        | Ditaxinae | Chrozophoreae |
| <i>Argythamnia lucayana</i> Millsp.                              | Ditaxeae | <i>Argythamnia lucayana</i> Millsp.                        | Ditaxinae | Chrozophoreae |
| <i>Argythamnia lundellii</i> J.Ingram                            | Ditaxeae | <i>Argythamnia lundellii</i> J.Ingram                      | Ditaxinae | Chrozophoreae |
| <i>Argythamnia macrantha</i> (Pax & K.Hoffm.) Croizat            | Ditaxeae | <i>Ditaxis macrantha</i> Pax & K.Hoffm.                    | Ditaxinae | Chrozophoreae |
| <i>Argythamnia macrobotrys</i> (Pax & K.Hoffm.) J.W.Ingram       | Ditaxeae | <i>Ditaxis macrobotrys</i> Pax & K.Hoffm.                  | Ditaxinae | Chrozophoreae |
| <i>Argythamnia malpighiacea</i> Ule                              | Ditaxeae | <i>Ditaxis malpighiacea</i> (Ule) Pax & K.Hoffm.           | Ditaxinae | Chrozophoreae |
| <i>Argythamnia malpighiphila</i> (Hicken) J.W.Ingram             | Ditaxeae | <i>Ditaxis malpighiphila</i> (Hicken) L.C.Wheeler          | Ditaxinae | Chrozophoreae |
| <i>Argythamnia manzanilloana</i> Rose                            | Ditaxeae | <i>Ditaxis manzanilloana</i> (Rose) Pax & K.Hoffm.         | Ditaxinae | Chrozophoreae |
| <i>Argythamnia mercurialina</i> (Nutt.) Müll.Arg.                | Ditaxeae | <i>Ditaxis mercurialina</i> (Nutt.) J.M.Coult.             | Ditaxinae | Chrozophoreae |
| <i>Argythamnia microphylla</i> Pax                               | Ditaxeae | <i>Argythamnia microphylla</i> Pax                         | Ditaxinae | Chrozophoreae |
| <i>Argythamnia montevidensis</i>                                 | Ditaxeae | <i>Ditaxis montevidensis</i> (Didr.)                       | Ditaxinae | Chrozophoreae |

|                                                           |             |                                                           |           |               |
|-----------------------------------------------------------|-------------|-----------------------------------------------------------|-----------|---------------|
| (Didr.) Müll.Arg.                                         |             | Pax                                                       |           |               |
| <i>Argythamnia moorei</i> J.Ingram                        | Ditaxeae    | <i>Argythamnia moorei</i> J.Ingram                        | Ditaxinae | Chrozophoreae |
| <i>Argythamnia oblongifolia</i> Urb.                      | Ditaxeae    | <i>Argythamnia oblongifolia</i> Urb.                      | Ditaxinae | Chrozophoreae |
| <i>Argythamnia pilosissima</i> (Benth.) Müll.Arg.         | Ditaxeae    | <i>Ditaxis pilosissima</i> (Benth.) A.Heller              | Ditaxinae | Chrozophoreae |
| <i>Argythamnia polygama</i> (Jacq.) Kuntze                | Ditaxeae    | <i>Ditaxis polygama</i> Jacq.                             | Ditaxinae | Chrozophoreae |
| <i>Argythamnia pringlei</i> Greenm.                       | Ditaxeae    | <i>Ditaxis pringlei</i> (Greenm.) Pax & K.Hoffm.          | Ditaxinae | Chrozophoreae |
| <i>Argythamia proctorii</i> J.Ingram                      | Ditaxeae    | <i>Argythamia proctorii</i> J.Ingram                      | Ditaxinae | Chrozophoreae |
| <i>Argythamnia purpurascens</i> S.Moore                   | Ditaxeae    | <i>Ditaxis purpurascens</i> (S. Moore) Pax & K.Hoffm.     | Ditaxinae | Chrozophoreae |
| <i>Argythamnia rubricaulis</i> (Pax & K.Hoffm.) Croizat   | Ditaxeae    | <i>Ditaxis rubricaulis</i> Pax & K.Hoffm.                 | Ditaxinae | Chrozophoreae |
| <i>Argythamnia salina</i> (Pax & K.Hoffm.) J.W.Ingram     | Ditaxeae    | <i>Ditaxis salina</i> Pax & K.Hoffm.                      | Ditaxinae | Chrozophoreae |
| <i>Argythamnia sellowiana</i> (Pax & K.Hoffm.) J.W.Ingram | Ditaxeae    | <i>Ditaxis sellowiana</i> Pax & K.Hoffm.                  | Ditaxinae | Chrozophoreae |
| <i>Argythamnia sericea</i> Griseb.                        | Ditaxeae    | <i>Argythamnia sericea</i> Griseb.                        | Ditaxinae | Chrozophoreae |
| <i>Argythamnia serrata</i> (Torr.) Müll.Arg.              | Ditaxeae    | <i>Ditaxis serrata</i> (Torr.) A.Heller                   | Ditaxinae | Chrozophoreae |
| <i>Argythamnia silviae</i> Y.Ramírez-Amezcu & V.W.Steinn. | Ditaxeae    | <i>Argythamnia silviae</i> Y.Ramírez-Amezcu & V.W.Steinn. | Ditaxinae | Chrozophoreae |
| <i>Argythamnia simoniana</i> (Casar.) Müll.Arg.           | Ditaxeae    | <i>Ditaxis simoniana</i> Casar.                           | Ditaxinae | Chrozophoreae |
| <i>Argythamnia simulans</i> J.W.Ingram                    | Ditaxeae    | <i>Argythamnia simulans</i> J.W.Ingram                    | Ditaxinae | Chrozophoreae |
| <i>Argythamnia sitiens</i> (T.S.Brandege) J.Ingram        | Ditaxeae    | <i>Argythamnia sitiens</i> (T.S.Brandege) J.Ingram        | Ditaxinae | Chrozophoreae |
| <i>Argythamnia stahlii</i> Urb.                           | Ditaxeae    | <i>Argythamnia stahlii</i> Urb.                           | Ditaxinae | Chrozophoreae |
| <i>Argythamnia tinctoria</i> Mill.                        | Ditaxeae    | <i>Argythamnia tinctoria</i> Mill.                        | Ditaxinae | Chrozophoreae |
| <i>Argythamnia wheeleri</i> J.Ingram                      | Ditaxeae    | <i>Argythamnia wheeleri</i> J.Ingram                      | Ditaxinae | Chrozophoreae |
| <i>Caperonia aculeolata</i> Müll.Arg.                     | Caperonieae | <i>Caperonia aculeolata</i> Müll.Arg.                     | Ditaxinae | Chrozophoreae |
| <i>Caperonia altissima</i> Eskuche                        | Caperonieae | <i>Caperonia altissima</i> Eskuche                        | Ditaxinae | Chrozophoreae |
| <i>Caperonia amarumayu</i> Külkamp & Cordeiro             | Caperonieae | <i>Caperonia amarumayu</i> Külkamp & Cordeiro             | Ditaxinae | Chrozophoreae |
| <i>Caperonia angustissima</i> Klotzsch                    | Caperonieae | <i>Caperonia angustissima</i> Klotzsch                    | Ditaxinae | Chrozophoreae |
| <i>Caperonia bahiensis</i> Müll.Arg.                      | Caperonieae | <i>Caperonia bahiensis</i> Müll.Arg.                      | Ditaxinae | Chrozophoreae |
| <i>Caperonia buettneriacea</i> Müll.Arg.                  | Caperonieae | <i>Caperonia buettneriacea</i> Müll.Arg.                  | Ditaxinae | Chrozophoreae |
| <i>Caperonia capiibariensis</i> Eskuche                   | Caperonieae | <i>Caperonia capiibariensis</i> Eskuche                   | Ditaxinae | Chrozophoreae |
| <i>Caperonia castaneifolia</i> (L.) A.St.-Hil.            | Caperonieae | <i>Caperonia castaneifolia</i> (L.) A.St.-Hil.            | Ditaxinae | Chrozophoreae |
| <i>Caperonia castrobarrosiana</i> Paula & Hamburgo        | Caperonieae | <i>Caperonia castrobarrosiana</i> Paula & Hamburgo        | Ditaxinae | Chrozophoreae |
| <i>Caperonia chiltepecensis</i> Croizat                   | Caperonieae | <i>Caperonia chiltepecensis</i> Croizat                   | Ditaxinae | Chrozophoreae |
| <i>Caperonia corchoroides</i> Müll.Arg.                   | Caperonieae | <i>Caperonia corchoroides</i> Müll.Arg.                   | Ditaxinae | Chrozophoreae |
| <i>Caperonia cordata</i> A.St.-Hil.                       | Caperonieae | <i>Caperonia cordata</i> A.St.-Hil.                       | Ditaxinae | Chrozophoreae |
| <i>Caperonia cubana</i> Pax & K.Hoffm.                    | Caperonieae | <i>Caperonia cubana</i> Pax & K.Hoffm.                    | Ditaxinae | Chrozophoreae |

|                                                                      |             |                                                                      |           |               |
|----------------------------------------------------------------------|-------------|----------------------------------------------------------------------|-----------|---------------|
| <i>Caperonia fistulosa</i> Beille                                    | Caperonieae | <i>Caperonia fistulosa</i> Beille                                    | Ditaxinae | Chrozophoreae |
| <i>Caperonia gardneri</i> Müll.Arg.                                  | Caperonieae | <i>Caperonia gardneri</i> Müll.Arg.                                  | Ditaxinae | Chrozophoreae |
| <i>Caperonia glabrata</i> Pax & K.Hoffm.                             | Caperonieae | <i>Caperonia glabrata</i> Pax & K.Hoffm.                             | Ditaxinae | Chrozophoreae |
| <i>Caperonia heteropetala</i> Didr.                                  | Caperonieae | <i>Caperonia heteropetala</i> Didr.                                  | Ditaxinae | Chrozophoreae |
| <i>Caperonia hystrix</i> Pax & K.Hoffm.                              | Caperonieae | <i>Caperonia hystrix</i> Pax & K.Hoffm.                              | Ditaxinae | Chrozophoreae |
| <i>Caperonia langsдорffii</i> Müll.Arg.                              | Caperonieae | <i>Caperonia langsдорffii</i> Müll.Arg.                              | Ditaxinae | Chrozophoreae |
| <i>Caperonia latifolia</i> Pax                                       | Caperonieae | <i>Caperonia latifolia</i> Pax                                       | Ditaxinae | Chrozophoreae |
| <i>Caperonia linearifolia</i> A.St.-Hil.                             | Caperonieae | <i>Caperonia linearifolia</i> A.St.-Hil.                             | Ditaxinae | Chrozophoreae |
| <i>Caperonia lutea</i> Pax & K.Hoffm.                                | Caperonieae | <i>Caperonia lutea</i> Pax & K.Hoffm.                                | Ditaxinae | Chrozophoreae |
| <i>Caperonia maracaibensis</i> Külkamp & Cordeiro                    | Caperonieae | <i>Caperonia maracaibensis</i> Külkamp & Cordeiro                    | Ditaxinae | Chrozophoreae |
| <i>Caperonia multicostata</i> Müll.Arg.                              | Caperonieae | <i>Caperonia multicostata</i> Müll.Arg.                              | Ditaxinae | Chrozophoreae |
| <i>Caperonia neglecta</i> G.L.Webster                                | Caperonieae | <i>Caperonia neglecta</i> G.L.Webster                                | Ditaxinae | Chrozophoreae |
| <i>Caperonia palustris</i> (L.) A.St.-Hil.                           | Caperonieae | <i>Caperonia palustris</i> (L.) A.St.-Hil.                           | Ditaxinae | Chrozophoreae |
| <i>Caperonia paraguayensis</i> Pax & K.Hoffm.                        | Caperonieae | <i>Caperonia paraguayensis</i> Pax & K.Hoffm.                        | Ditaxinae | Chrozophoreae |
| <i>Caperonia regnellii</i> Müll.Arg.                                 | Caperonieae | <i>Caperonia regnellii</i> Müll.Arg.                                 | Ditaxinae | Chrozophoreae |
| <i>Caperonia rutenbergii</i> Müll.Arg.                               | Caperonieae | <i>Caperonia rutenbergii</i> Müll.Arg.                               | Ditaxinae | Chrozophoreae |
| <i>Caperonia serrata</i> (Turcz.) C.Presl.                           | Caperonieae | <i>Caperonia serrata</i> (Turcz.) C.Presl.                           | Ditaxinae | Chrozophoreae |
| <i>Caperonia similis</i> Pax & K.Hoffm.                              | Caperonieae | <i>Caperonia similis</i> Pax & K.Hoffm.                              | Ditaxinae | Chrozophoreae |
| <i>Caperonia stenophylla</i> Müll.Arg.                               | Caperonieae | <i>Caperonia stenophylla</i> Müll.Arg.                               | Ditaxinae | Chrozophoreae |
| <i>Caperonia stuhlmannii</i> Pax                                     | Caperonieae | <i>Caperonia stuhlmannii</i> Pax                                     | Ditaxinae | Chrozophoreae |
| <i>Caperonia subrotunda</i> Chiov.                                   | Caperonieae | <i>Caperonia subrotunda</i> Chiov.                                   | Ditaxinae | Chrozophoreae |
| <i>Caperonia zaponzeta</i> Mansf.                                    | Caperonieae | <i>Caperonia zaponzeta</i> Mansf.                                    | Ditaxinae | Chrozophoreae |
| <i>Chiropetalum anisotrichum</i> (Müll.Arg.) Pax & K.Hoffm.          | Ditaxeae    | <i>Chiropetalum anisotrichum</i> (Müll.Arg.) Pax & K.Hoffm.          | Ditaxinae | Chrozophoreae |
| <i>Chiropetalum argentinense</i> Skottsb.                            | Ditaxeae    | <i>Chiropetalum argentinense</i> Skottsb.                            | Ditaxinae | Chrozophoreae |
| <i>Chiropetalum astroplethos</i> (J.W. Ingram) Radcl.-Sm. & Govaerts | Ditaxeae    | <i>Chiropetalum astroplethos</i> (J.W. Ingram) Radcl.-Sm. & Govaerts | Ditaxinae | Chrozophoreae |
| <i>Chiropetalum berterioanum</i> Schltdl.                            | Ditaxeae    | <i>Chiropetalum berterioanum</i> Schltdl.                            | Ditaxinae | Chrozophoreae |
| <i>Chiropetalum boliviense</i> (Müll.Arg.) Pax & K.Hoffm.            | Ditaxeae    | <i>Chiropetalum boliviense</i> (Müll.Arg.) Pax & K.Hoffm.            | Ditaxinae | Chrozophoreae |
| <i>Chiropetalum canescens</i> Phil.                                  | Ditaxeae    | <i>Chiropetalum canescens</i> Phil.                                  | Ditaxinae | Chrozophoreae |
| <i>Chiropetalum cremnophilum</i> I.M.Johnst.                         | Ditaxeae    | <i>Chiropetalum cremnophilum</i> I.M.Johnst.                         | Ditaxinae | Chrozophoreae |
| <i>Chiropetalum foliosum</i> Pax & K.Hoffm.                          | Ditaxeae    | <i>Chiropetalum foliosum</i> Pax & K.Hoffm.                          | Ditaxinae | Chrozophoreae |
| <i>Chiropetalum griseum</i> Griseb.                                  | Ditaxeae    | <i>Chiropetalum griseum</i> Griseb.                                  | Ditaxinae | Chrozophoreae |
| <i>Chiropetalum intermedium</i> Pax & K.Hoffm.                       | Ditaxeae    | <i>Chiropetalum intermedium</i> Pax & K.Hoffm.                       | Ditaxinae | Chrozophoreae |
| <i>Chiropetalum molle</i> (Klotzsch ex. Baill.) Pax & K.Hoffm.       | Ditaxeae    | <i>Chiropetalum molle</i> (Klotzsch ex. Baill.) Pax & K.Hoffm.       | Ditaxinae | Chrozophoreae |

|                                                                   |           |                                                                   |           |               |
|-------------------------------------------------------------------|-----------|-------------------------------------------------------------------|-----------|---------------|
| <i>Chiropetalum patagonicum</i> (Speg.) O'Donell & Lourteig       | Ditaxaeae | <i>Chiropetalum patagonicum</i> (Speg.) O'Donell & Lourteig       | Ditaxinae | Chrozophoreae |
| <i>Chiropetalum pavonianum</i> (Müll.Arg.) Pax                    | Ditaxaeae | <i>Chiropetalum pavonianum</i> (Müll.Arg.) Pax                    | Ditaxinae | Chrozophoreae |
| <i>Chiropetalum phalacradenium</i> (J.W.Ingram) L.B.Sm. & Downs   | Ditaxaeae | <i>Chiropetalum phalacradenium</i> (J.W.Ingram) L.B.Sm. & Downs   | Ditaxinae | Chrozophoreae |
| <i>Chiropetalum puntaloberense</i> Alonso Paz & Bassagoda         | Ditaxaeae | <i>Chiropetalum puntaloberense</i> Alonso Paz & Bassagoda         | Ditaxinae | Chrozophoreae |
| <i>Chiropetalum quinquecuspidatum</i> (A.Juss.) Pax & K.Hoffm.    | Ditaxaeae | <i>Chiropetalum quinquecuspidatum</i> (A.Juss.) Pax & K.Hoffm.    | Ditaxinae | Chrozophoreae |
| <i>Chiropetalum ramboi</i> (Allem & Irgang) Radcl.-Sm. & Govaerts | Ditaxaeae | <i>Chiropetalum ramboi</i> (Allem & Irgang) Radcl.-Sm. & Govaerts | Ditaxinae | Chrozophoreae |
| <i>Chiropetalum ruizianum</i> (Müll.Arg.) Pax & K.Hoffm.          | Ditaxaeae | <i>Chiropetalum ruizianum</i> (Müll.Arg.) Pax & K.Hoffm.          | Ditaxinae | Chrozophoreae |
| <i>Chiropetalum schiedeanum</i> (Müll.Arg.) Pax                   | Ditaxaeae | <i>Chiropetalum schiedeanum</i> (Müll.Arg.) Pax                   | Ditaxinae | Chrozophoreae |
| <i>Chiropetalum tricoccum</i> (Vell.) Chodat & Hassl              | Ditaxaeae | <i>Chiropetalum tricoccum</i> (Vell.) Chodat & Hassl              | Ditaxinae | Chrozophoreae |
| <i>Chiropetalum tricuspidatum</i> (Lam.) A.Juss.                  | Ditaxaeae | <i>Chiropetalum tricuspidatum</i> (Lam.) A.Juss.                  | Ditaxinae | Chrozophoreae |
| <i>Garciadelia abbottii</i> Jestrow & Jiménez Rodr.               | Adelieae  | <i>Garciadelia abbottii</i> Jestrow & Jiménez Rodr.               | -         | Adelieae      |
| <i>Garciadelia castilloae</i> Jestrow & Jiménez Rodr.             | Adelieae  | <i>Garciadelia castilloae</i> Jestrow & Jiménez Rodr.             | -         | Adelieae      |
| <i>Garciadelia leprosa</i> (Willd.) Jestrow & Jiménez Rodr.       | Adelieae  | <i>Garciadelia leprosa</i> (Willd.) Jestrow & Jiménez Rodr.       | -         | Adelieae      |
| <i>Garciadelia mejiae</i> Jestrow & Jiménez Rodr.                 | Adelieae  | <i>Garciadelia mejiae</i> Jestrow & Jiménez Rodr.                 | -         | Adelieae      |
| <i>Lasiocroton bahamensis</i> Pax & K.Hoffm.                      | Adelieae  | <i>Lasiocroton bahamensis</i> Pax & K.Hoffm.                      | -         | Adelieae      |
| <i>Lasiocroton fawcettii</i> Urb.                                 | Adelieae  | <i>Lasiocroton fawcettii</i> Urb.                                 | -         | Adelieae      |
| <i>Lasiocroton gracilis</i> Britton & P.Wilson                    | Adelieae  | <i>Lasiocroton gracilis</i> Britton & P.Wilson                    | -         | Adelieae      |
| <i>Lasiocroton gutierrezii</i> Jestrow                            | Adelieae  | <i>Lasiocroton gutierrezii</i> Jestrow                            | -         | Adelieae      |
| <i>Lasiocroton harrisii</i> Britton                               | Adelieae  | <i>Lasiocroton harrisii</i> Britton                               | -         | Adelieae      |
| <i>Lasiocroton macrophyllus</i> (Sw.) Griseb.                     | Adelieae  | <i>Lasiocroton macrophyllus</i> (Sw.) Griseb.                     | -         | Adelieae      |
| <i>Lasiocroton microphyllus</i> (A.Rich.) Jestrow                 | Adelieae  | <i>Lasiocroton microphyllus</i> (A.Rich.) Jestrow                 | -         | Adelieae      |
| <i>Leucocroton acunae</i> Borhidi                                 | Adelieae  | <i>Leucocroton acunae</i> Borhidi                                 | -         | Adelieae      |
| <i>Leucocroton anomalus</i> Borhidi                               | Adelieae  | <i>Leucocroton anomalus</i> Borhidi                               | -         | Adelieae      |
| <i>Leucocroton bracteosus</i> Urb.                                | Adelieae  | <i>Leucocroton bracteosus</i> Urb.                                | -         | Adelieae      |
| <i>Leucocroton brittonii</i> Alain                                | Adelieae  | <i>Leucocroton brittonii</i> Alain                                | -         | Adelieae      |
| <i>Leucocroton comosus</i> Urb.                                   | Adelieae  | <i>Leucocroton comosus</i> Urb.                                   | -         | Adelieae      |
| <i>Leucocroton cordifolius</i> (Britton & P.Wilson) Alain         | Adelieae  | <i>Leucocroton cordifolius</i> (Britton & P.Wilson) Alain         | -         | Adelieae      |
| <i>Leucocroton discolor</i> Urb.                                  | Adelieae  | <i>Leucocroton discolor</i> Urb.                                  | -         | Adelieae      |
| <i>Leucocroton ekmanii</i> Urb.                                   | Adelieae  | <i>Leucocroton ekmanii</i> Urb.                                   | -         | Adelieae      |
| <i>Leucocroton flavicans</i> Müll.Arg.                            | Adelieae  | <i>Leucocroton flavicans</i> Müll.Arg.                            | -         | Adelieae      |
| <i>Leucocroton havanensis</i> Borhidi                             | Adelieae  | <i>Leucocroton havanensis</i> Borhidi                             | -         | Adelieae      |
| <i>Leucocroton incrustatus</i> Borhidi                            | Adelieae  | <i>Leucocroton incrustatus</i> Borhidi                            | -         | Adelieae      |

|                                                |          |                                                |   |          |
|------------------------------------------------|----------|------------------------------------------------|---|----------|
| <i>Leucocroton linearifolius</i> Britton       | Adelieae | <i>Leucocroton linearifolius</i> Britton       | - | Adelieae |
| <i>Leucocroton longibracteatus</i> Borhidi     | Adelieae | <i>Leucocroton longibracteatus</i> Borhidi     | - | Adelieae |
| <i>Leucocroton moaensis</i> Borhidi & O.Muñiz  | Adelieae | <i>Leucocroton moaensis</i> Borhidi & O.Muñiz  | - | Adelieae |
| <i>Leucocroton moncadae</i> Borhidi            | Adelieae | <i>Leucocroton moncadae</i> Borhidi            | - | Adelieae |
| <i>Leucocroton obovatus</i> Urb.               | Adelieae | <i>Leucocroton obovatus</i> Urb.               | - | Adelieae |
| <i>Leucocroton pachyphylloides</i> Borhidi     | Adelieae | <i>Leucocroton pachyphylloides</i> Borhidi     | - | Adelieae |
| <i>Leucocroton pachyphyllus</i> Urb.           | Adelieae | <i>Leucocroton pachyphyllus</i> Urb.           | - | Adelieae |
| <i>Leucocroton pallidus</i> Britton & P.Wilson | Adelieae | <i>Leucocroton pallidus</i> Britton & P.Wilson | - | Adelieae |
| <i>Leucocroton revolutus</i> C.Wright          | Adelieae | <i>Leucocroton revolutus</i> C.Wright          | - | Adelieae |
| <i>Leucocroton sameki</i> Borhidi              | Adelieae | <i>Leucocroton sameki</i> Borhidi              | - | Adelieae |
| <i>Leucocroton saxicola</i> Britton            | Adelieae | <i>Leucocroton saxicola</i> Britton            | - | Adelieae |
| <i>Leucocroton stenophyllus</i> Urb.           | Adelieae | <i>Leucocroton stenophyllus</i> Urb.           | - | Adelieae |
| <i>Leucocroton subpeltatus</i> (Urb.) Alain    | Adelieae | <i>Leucocroton subpeltatus</i> (Urb.) Alain    | - | Adelieae |
| <i>Leucocroton virens</i> Griseb.              | Adelieae | <i>Leucocroton virens</i> Griseb.              | - | Adelieae |
| <i>Leucocroton wrightii</i> Griseb.            | Adelieae | <i>Leucocroton wrightii</i> Griseb.            | - | Adelieae |
| <i>Philyra brasiliensis</i> Klotzsch           | Adelieae | <i>Philyra brasiliensis</i> Klotzsch           | - | Adelieae |
